# Supplementary material for: Identifying gene targets for brain-related traits using transcriptomic and methylomic data from blood
Source: PubMed Central journal article supplement (PMC5995828; doi:10.1038/s41467-018-04558-1), 2018-06-11
Supplement: 41467_2018_4558_MOESM1_ESM.pdf [file 41467_2018_4558_MOESM1_ESM.pdf]

**Identifying gene targets for brain-related traits using transcriptomic and methylomic data from blood**

**Qi et al.**

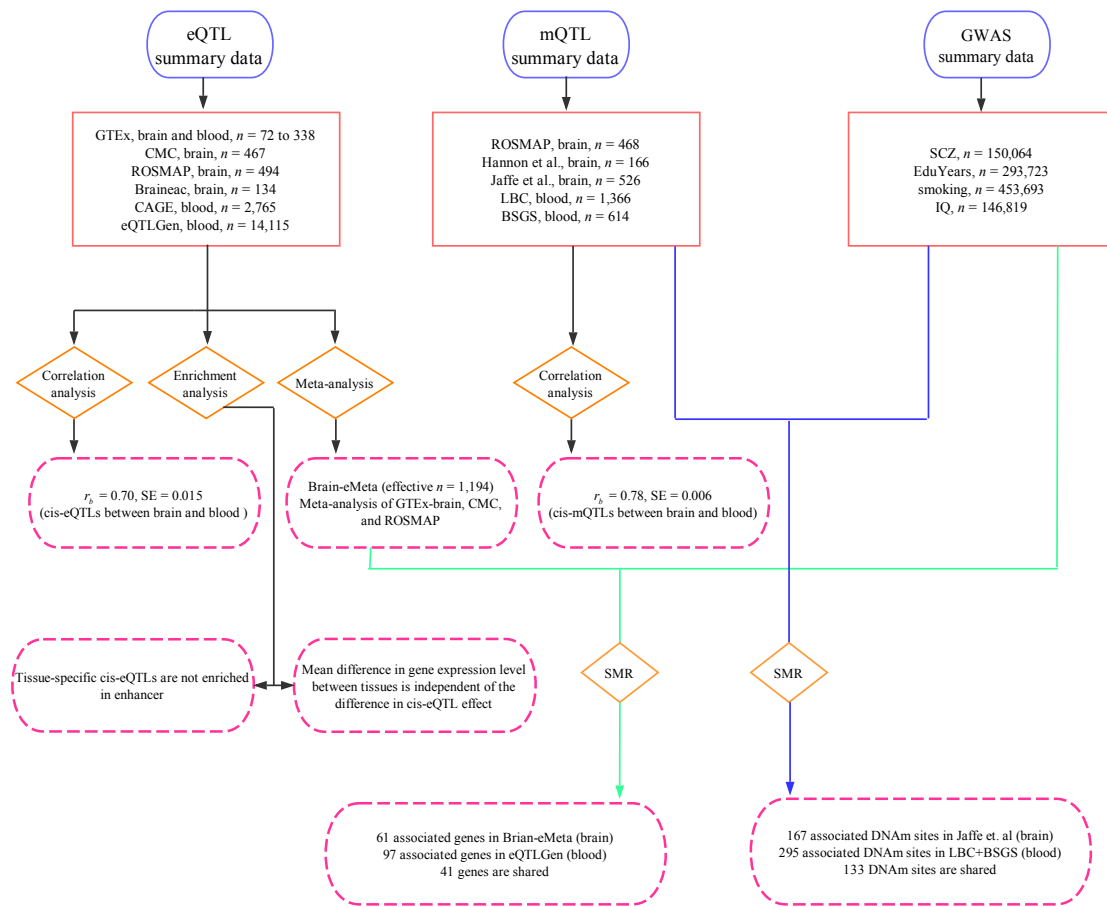

**Supplementary Figure 1** Schematic overview of this study.

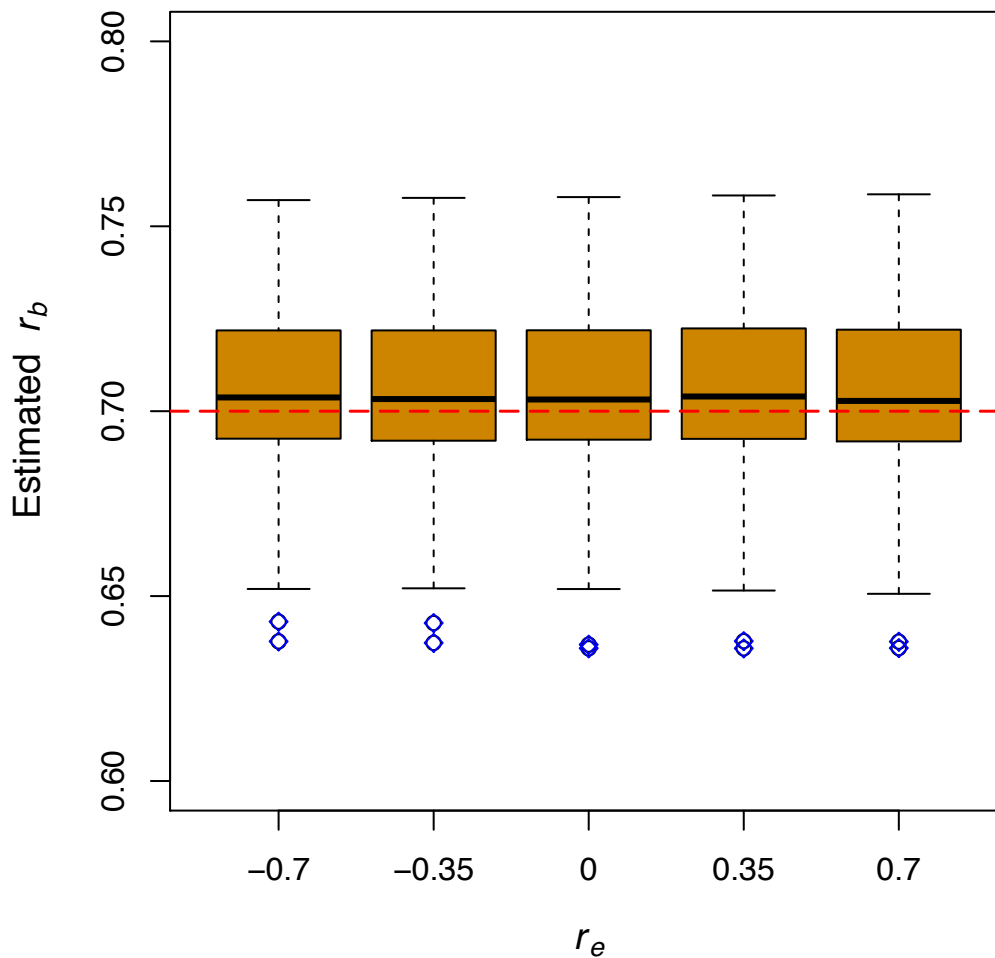

**Supplementary Figure 2** Estimated  $r_b$  between two tissues at different levels of residual correlation ( $r_e$ ) in simulations. The phenotypes were simulated based on the UK10K data set<sup>1</sup> with the SNPs in common with HapMap3 (see **Supplementary Note 1** for details). In brief, we simulated gene expression data in three tissues with correlated eQTL effects and residuals. In the  $r_b$  analysis of the simulated data, to avoid bias due to the winner's curse, we selected the top associated SNPs at  $P_{\text{eQTL}} < 5 \times 10^{-8}$  in tissue #1, and estimated the correlation of top cis-eQTL effects between tissues #2 and #3. Each box in the figure represents the distribution of estimates from 100 simulation replicates. The red dash line represents the simulation parameter (i.e.  $\rho = 0.7$ ). It is of note that here we compare the estimate of  $r_b$  between tissues #2 and #3 for genes with cis-eQTLs of relatively large effect (because of the ascertainment of the top cis-eQTLs by a stringent p-value threshold in tissue #1) with the parameter ( $\rho$ ) used to simulate the correlation of cis-eQTLs effects between the tissues across all genes (**Supplementary Note 1**). Therefore, the estimate of  $r_b$  is not expected to be an unbiased estimator of  $\rho$ .

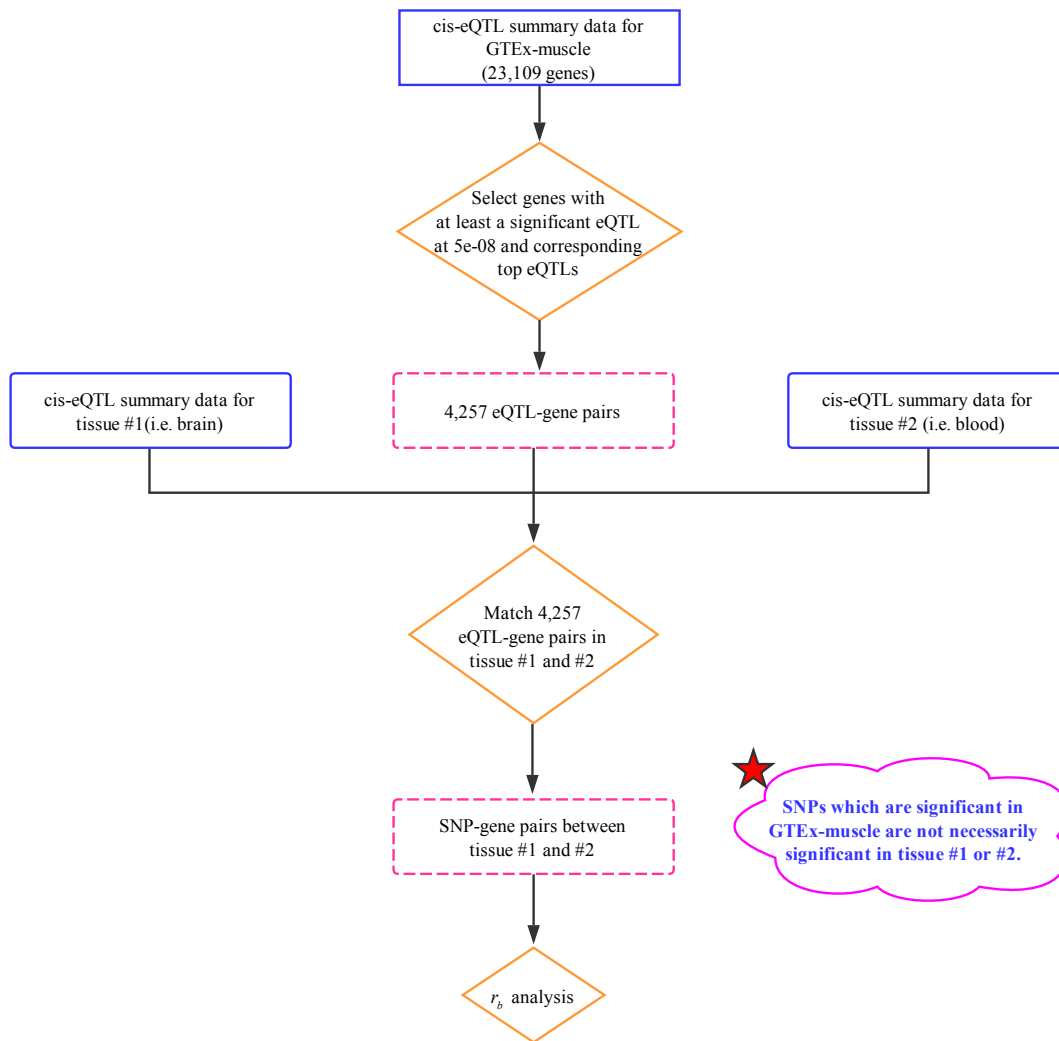

**Supplementary Figure 3** Schematic overview of the  $r_b$  analysis.

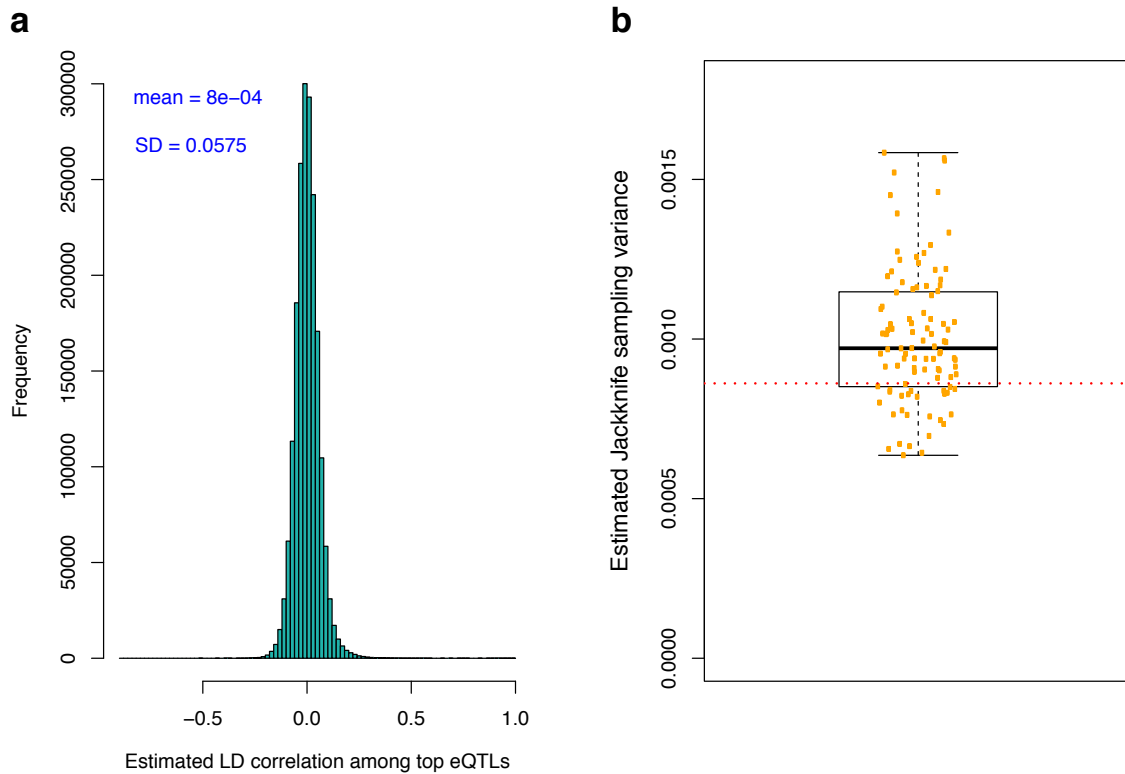

**Supplementary Figure 4** Distributions of the LD correlations among 4,257 top cis-eQTLs and the estimated Jackknife sample variation from 100 simulation replicates. The 4,257 genes were selected at  $P_{eQTL} < 5 \times 10^{-8}$  in GTEx-muscle. Shown in panel **a** is the distribution of the LD correlations among 4,257 top cis-eQTLs computed from the GTEx genotype data. The 4,257 cis-eQTLs are distributed across the whole genome with a mean LD  $r = 0.0008$  (SD = 0.0575), suggesting that most of them are independent. Shown in panel **b** is the distribution of estimated Jackknife sample variance across 100 simulation replicates. We simulated gene expression data based on the UK10K data set<sup>1</sup> with the SNPs in common with HapMap3 (see **Supplementary Note 1** for details) in three tissues with correlated eQTL effects ( $r_b = 0.7$ ) and residuals ( $r_e = -0.7$ ). In the  $r_b$  analysis of the simulated data, to avoid bias due to the winner's curse, we selected the top associated SNPs at  $P_{eQTL} < 5 \times 10^{-8}$  in tissue #1, and estimated the correlation of top cis-eQTL effects between tissues #2 and #3. The dots in panel **b** represent estimated Jackknife sample variance from 100 simulation replicates. The red dash line represents the variance of estimated  $r_b$  from 100 simulation replicates. It is of note that the mean Jackknife sample variance is slightly larger than the observed sample variance.

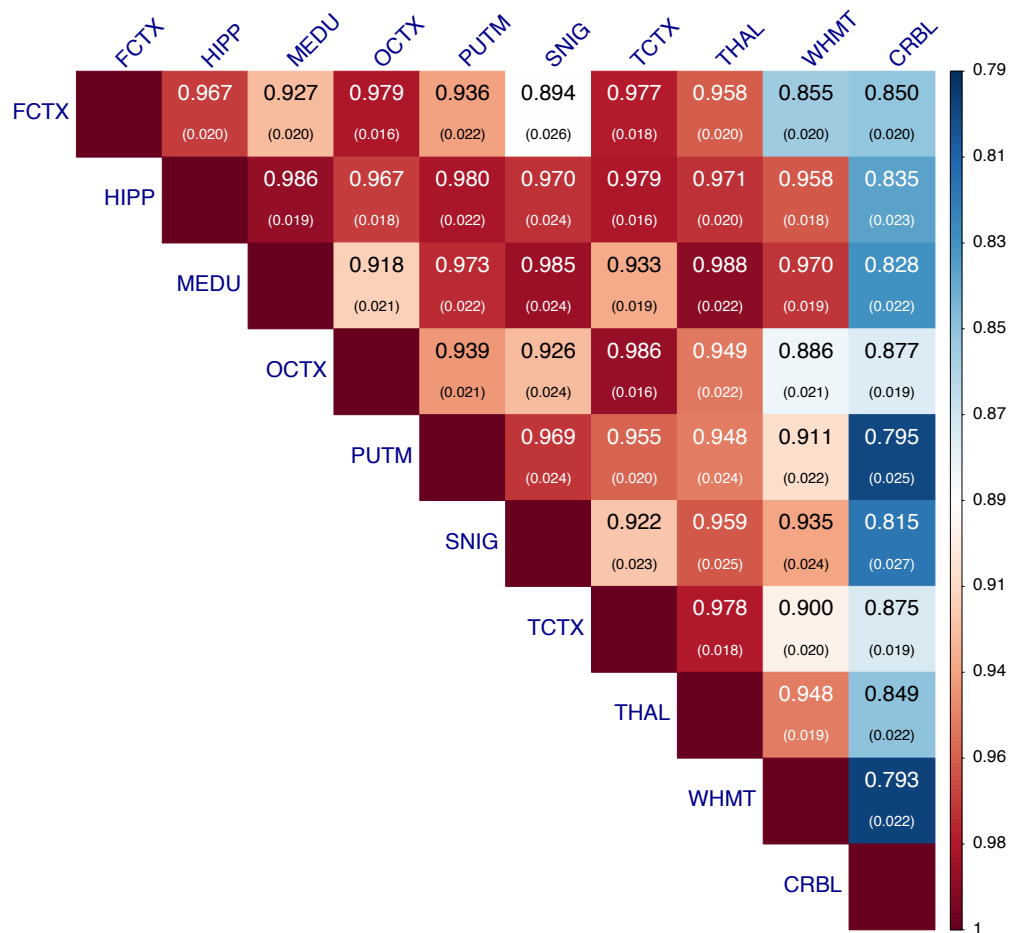

**Supplementary Figure 5** Estimated  $r_b$  of cis-eQTLs among 10 brain regions in Braineac. The top cis-eQTLs were selected from GTEx-muscle at  $P_{eQTL} < 5 \times 10^{-8}$ . We matched the Braineac data with GTEx-muscle by gene symbols and excluded genes tagged by multiple probes. Shown in each cell is the estimate of  $r_b$  with its standard error given in the parentheses (**Methods**). FCTX, frontal cortex; HIPP, hippocampus; MEDU, medulla (specifically inferior olivary nucleus); OCTX, occipital cortex (specifically primary visual cortex); PUTM, putamen; SNIG, substantia nigra; THAL, thalamus; TCTX, temporal cortex; WHMT, intralobular white matter; CRBL, cerebellar cortex.

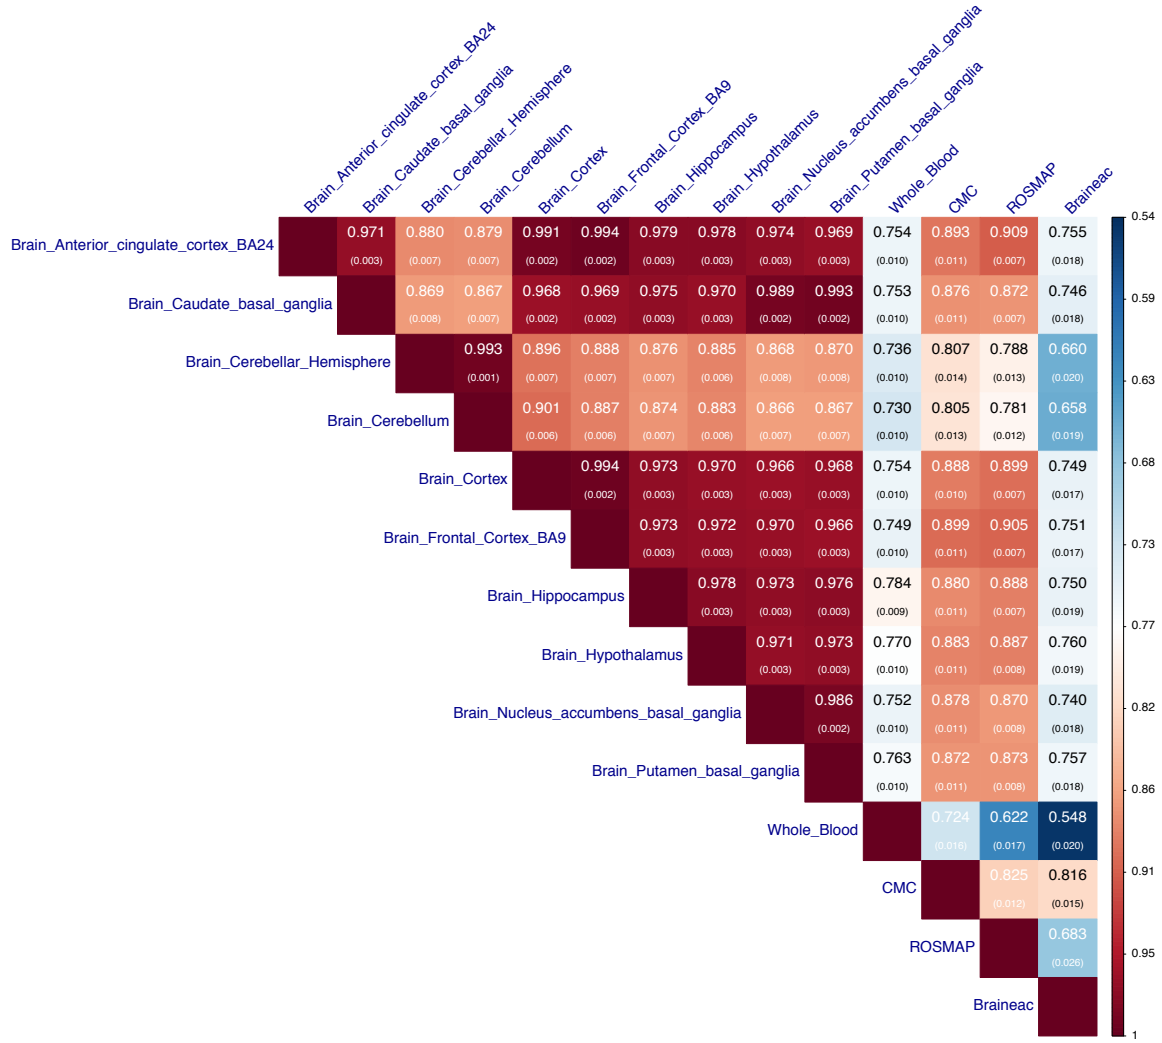

**Supplementary Figure 6** Estimated  $r_b$  of the scaled cis-eQTL effects between brain regions, between brain and blood tissues, and between data sets. We know that the SE of an estimated eQTL effect is a function of the minor allele frequency (MAF) of the eQTL. In the analysis presented in **Figure 1**, we used the mean SE squared across genes to estimate the variance of estimation errors (**Methods**). However, MAFs of cis-eQTLs are different across genes. We therefore scaled the eQTL effect size and SE as  $\hat{b}_{scale} = \hat{b}\sqrt{2p(1-p)}$  and  $s_{scale} = s\sqrt{2p(1-p)}$ , where  $\hat{b}_{scale}$  is interpreted as the eQTL effect size per-standardized genotype,  $p$  is MAF,  $\hat{b}$  is the estimated eQTL effect, and  $s$  is the standard error of  $\hat{b}$ . We then re-ran the  $r_b$  analysis using the scaled cis-eQTL effects and SEs (**Methods**). The top cis-eQTLs were selected from the GTEx-muscle data at  $P_{eQTL} < 5 \times 10^{-8}$ . Shown in each cell is the estimate of  $r_b$  with its standard error given in the parentheses. These results are almost identical to those presented in **Figure 1**, suggesting that the method is robust to scale transformation of the eQTL effects.

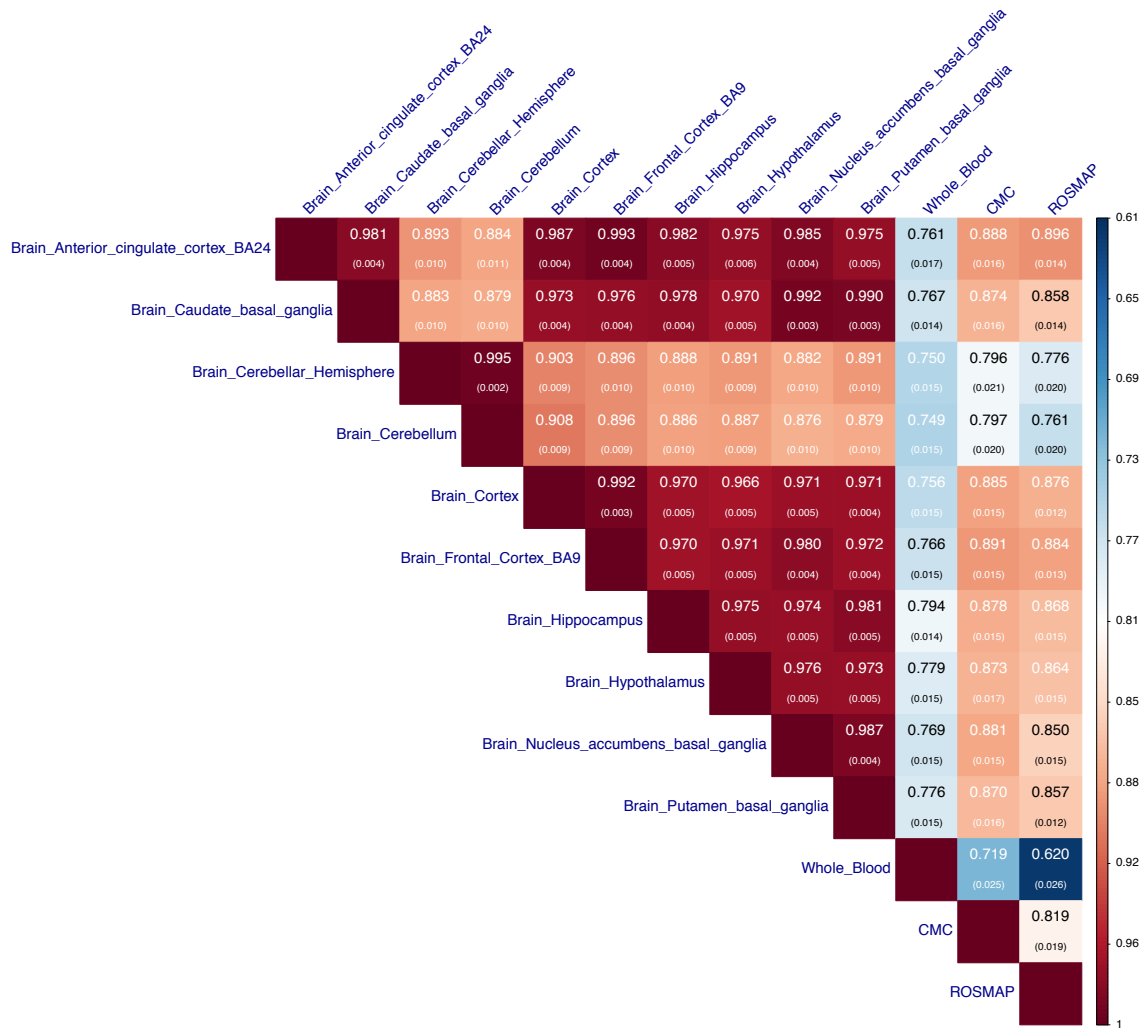

**Supplementary Figure 7** Estimated  $r_b$  of cis-eQTLs between brain regions, between brain and blood tissues, and between data sets, excluding the cis-QTLs within 10Kb of the promoter regions. Shown in each cell is the estimate of  $r_b$  with its standard error given in the parentheses (**Methods**).



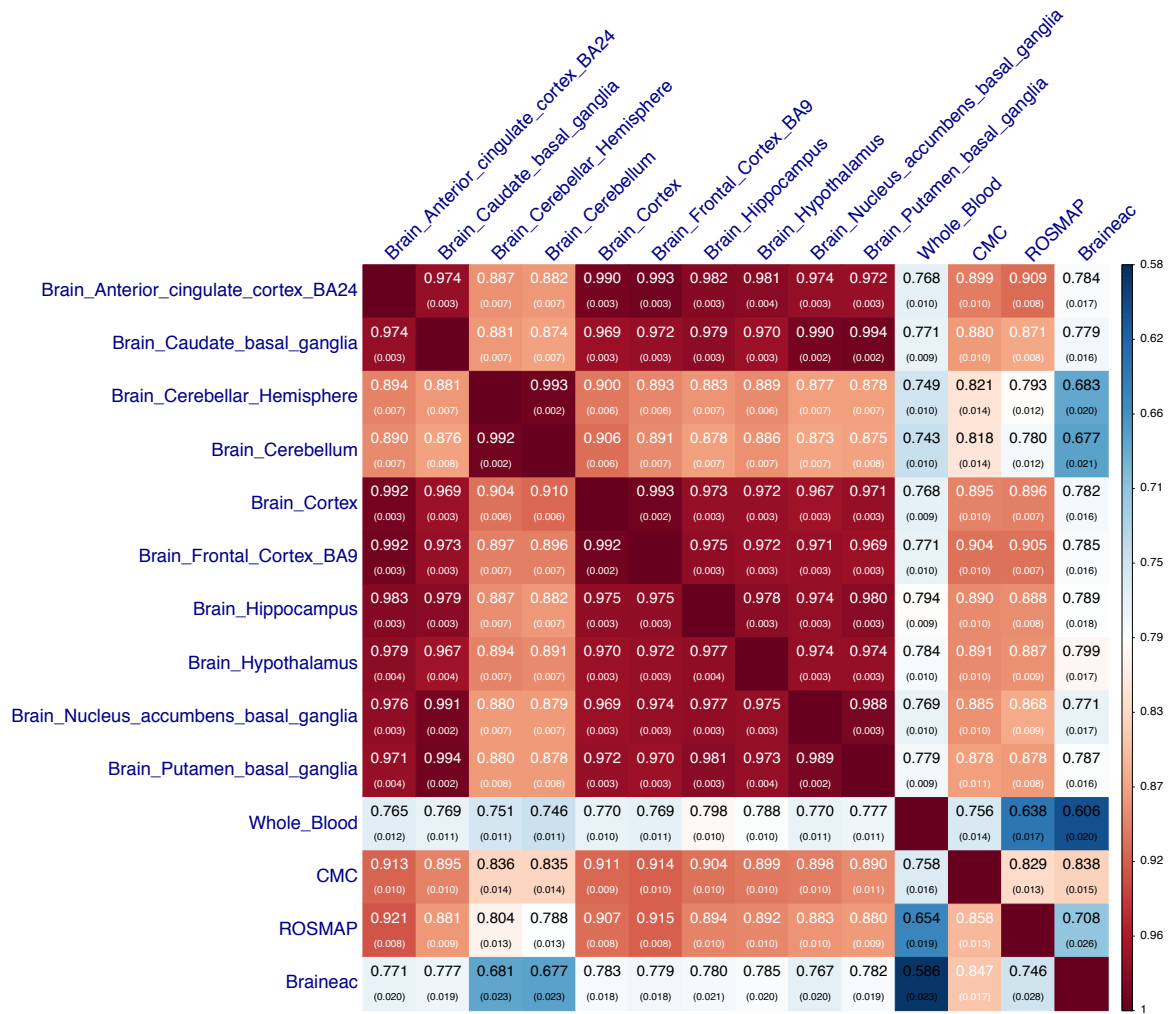

**Supplementary Figure 8** Estimated  $r_b$  of cis-eQTLs between brain regions, between brain and blood tissues, and between data sets, excluding the housekeeping (HK) genes obtained from Lin et al.<sup>2</sup> (upper right) and Eisenberg et al.<sup>3</sup> (lower left). There were 4,257 genes in our ascertained gene list. The number of HK genes in the ascertained gene list (e.g.  $m = 220$  for Lin et al.) is significantly higher than what we would expect from a random sample of genes (mean = 187 with SD = 12.2 from 2,000 random gene sets). This is expected, because HK genes are defined as a set of genes expressed across most cell types and tissues, which are expected to be enriched in genes expressed in both brain and blood. We re-ran the  $r_b$  analysis excluding the HK genes. The results are almost identical to those presented in **Figure 1**, suggesting that the estimates of  $r_b$  are robust to the inclusion/exclusion of HK genes. Shown in each cell is the estimate of  $r_b$  with its standard error given in the parentheses (**Methods**).

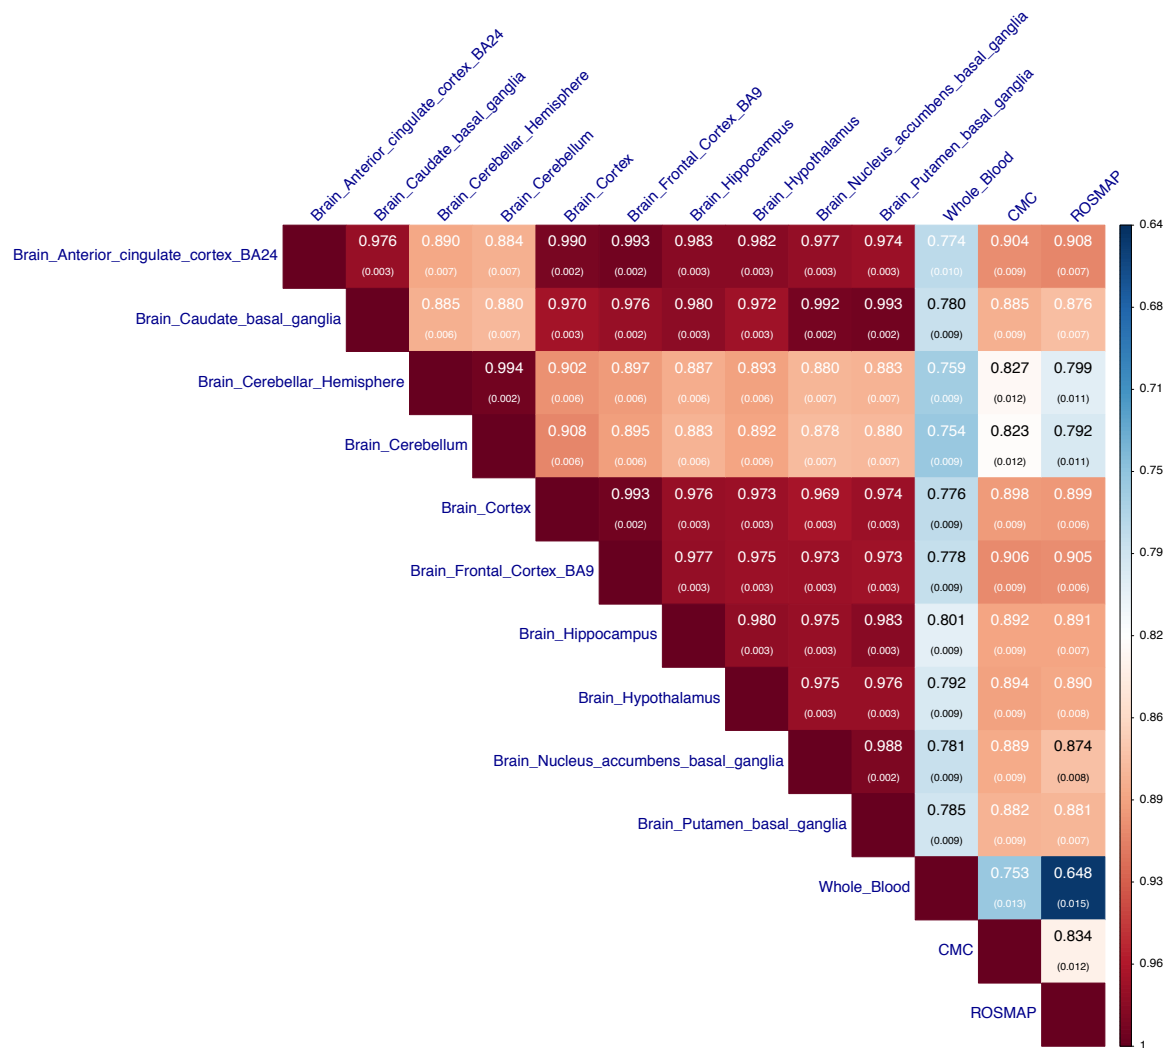

**Supplementary Figure 9** Estimated  $r_b$  of cis-eQTLs including both the primary and secondary signals between brain regions, between brain and blood tissues, and between data sets. Conditional analysis was performed in each of the cis-eQTL regions in GTEx-muscle using a summary-data-based conditional analysis method in GCTA<sup>4,5</sup>. We identified secondary signals by the conditional analysis for 659 probes. Shown in each cell is the estimate of  $r_b$  with its standard error given in the parentheses (**Methods**).

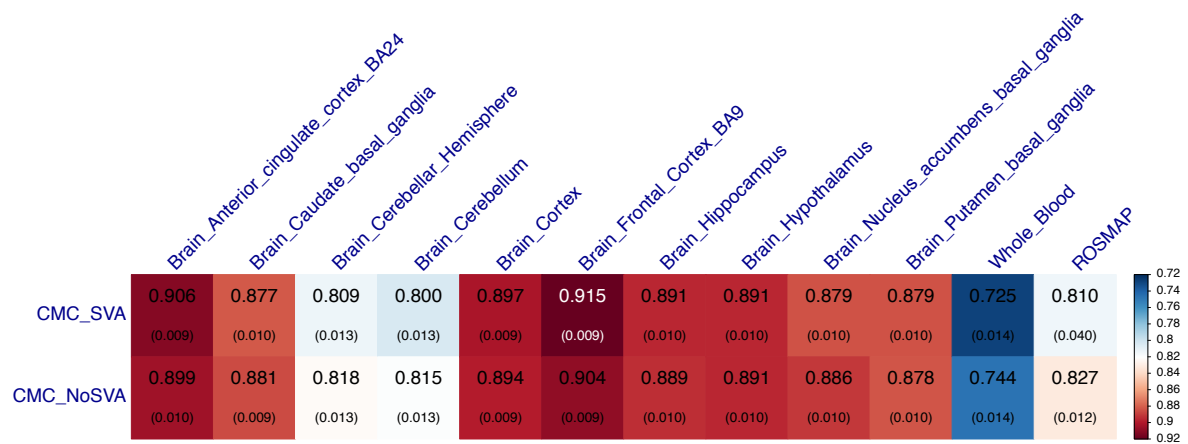

**Supplementary Figure 10** Estimated  $r_b$  of cis-eQTLs between two versions of CMC data and GTEx-brain, GTEx-blood and ROSMAP. CMC\_SVA represents gene expression data in CMC adjusted by the surrogate variable analysis (SVA), where SVA is an approach used to overcome the problems caused by heterogeneity in expression studies<sup>6</sup>. CMC\_NoSVA represents CMC data without SVA adjustment. Shown in each cell is the estimate of  $r_b$  with its standard error given in the parentheses (**Methods**).

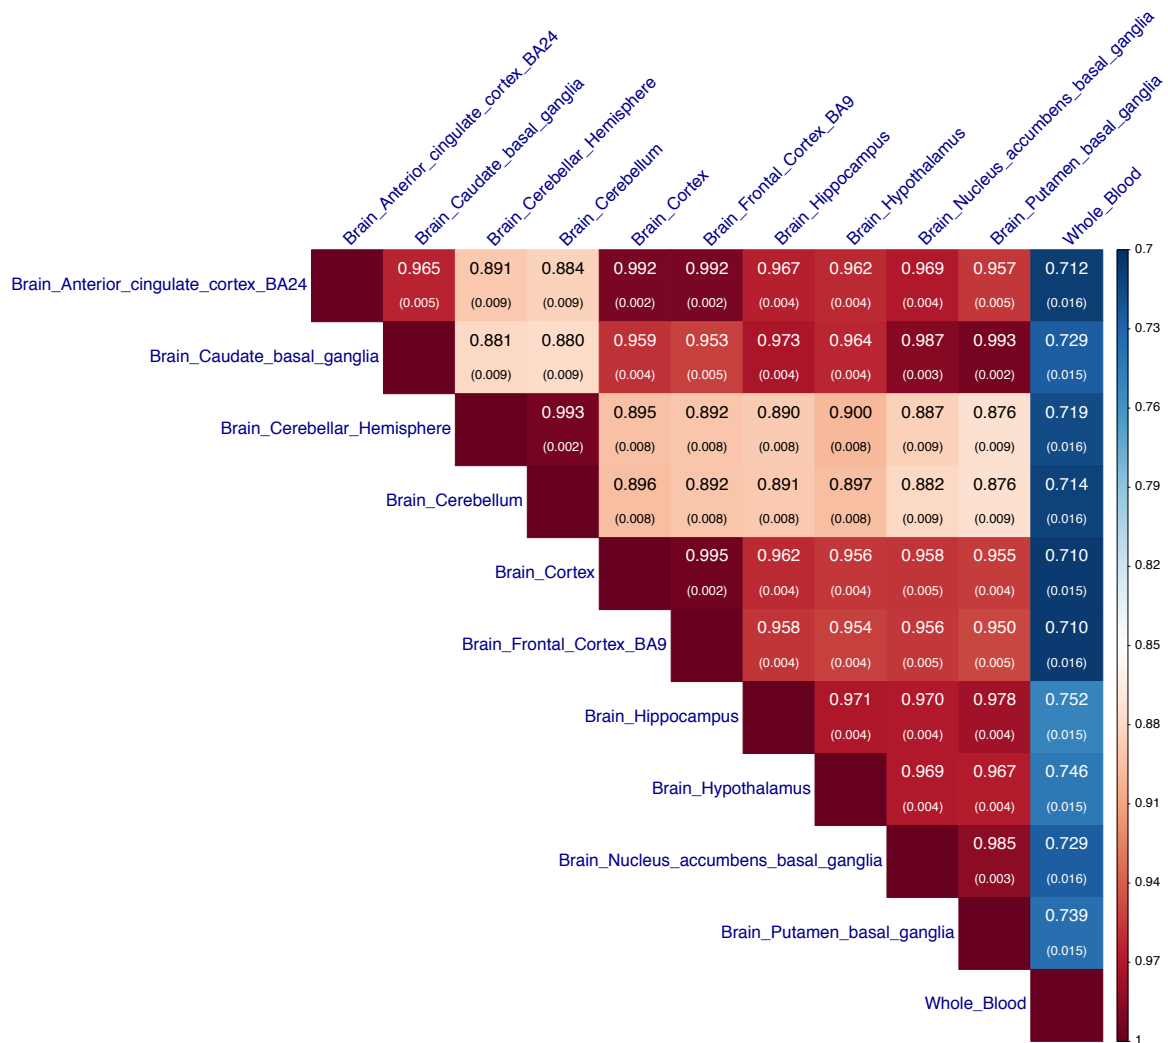

**Supplementary Figure 11** Estimated  $r_b$  among 11 GTEx tissues for cis-eQTL ascertained from CMC. The top cis-eQTLs were selected from the CMC data at  $P_{eQTL} < 5 \times 10^{-8}$ . Shown in each cell is the estimate of  $r_b$  with its standard error given in the parentheses (**Methods**).

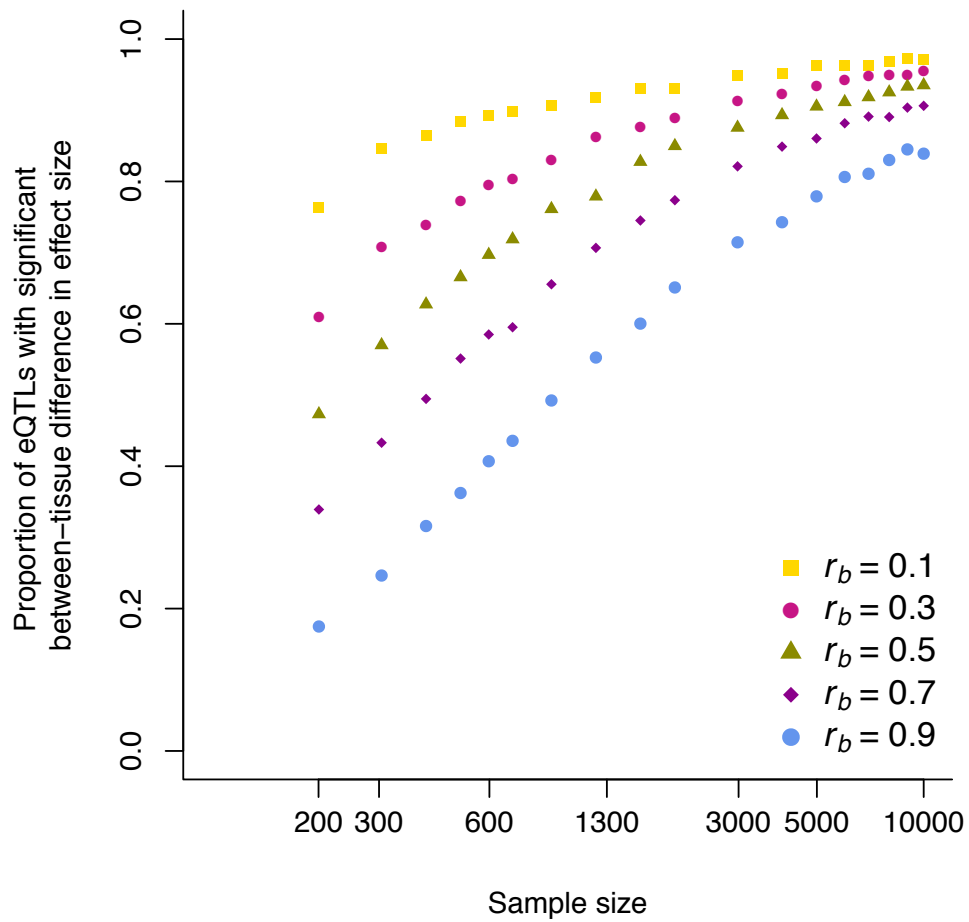

**Supplementary Figure 12** Proportion of eQTLs with significant difference in effect size between-tissues (after Bonferroni correction for multiple testing) as a function of sample size and  $r_b$ . Each dot represents the mean estimate from 1,000 simulation replicates (**Supplementary Note 1**).

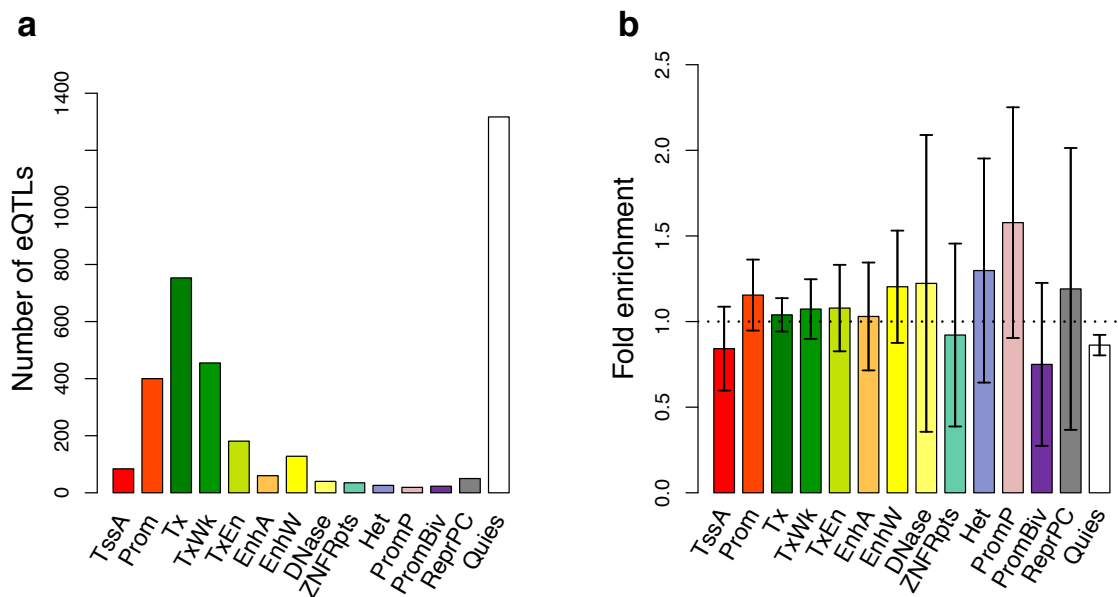

**Supplementary Figure 13** Enrichment of cis-eQTLs with tissue-specific effects in functional annotations. **a** The distribution of cis-eQTLs across 14 functional categories derived from Roadmap Epigenomics Mapping Consortium (REMC) (**Methods**). **b** Estimated enrichment of test-statistics for the difference ( $T_D$ ) (testing for the difference in cis-eQTL effect between GTEx-cerebellum and GTEx-blood) in each functional category (**Methods**). Error bars represent 95% confidence intervals around the estimates. The black dash line represents fold enrichment of 1. Different colors in panels **a** and **b** represent the 14 functional categories from REMC: TssA, active transcription start site; Prom, upstream/downstream TSS promoter; Tx, actively transcribed state; TxWk, weak transcription; TxEn, transcribed and regulatory Prom/Enh; EnhA, active enhancer; EnhW, weak enhancer; DNase, primary DNase; ZNF/Rpts, state associated with zinc finger protein genes; Het, constitutive heterochromatin; PromP, Poised promoter; PromBiv, bivalent regulatory states; ReprPC, repressed Polycomb states; and Quies, a quiescent state.

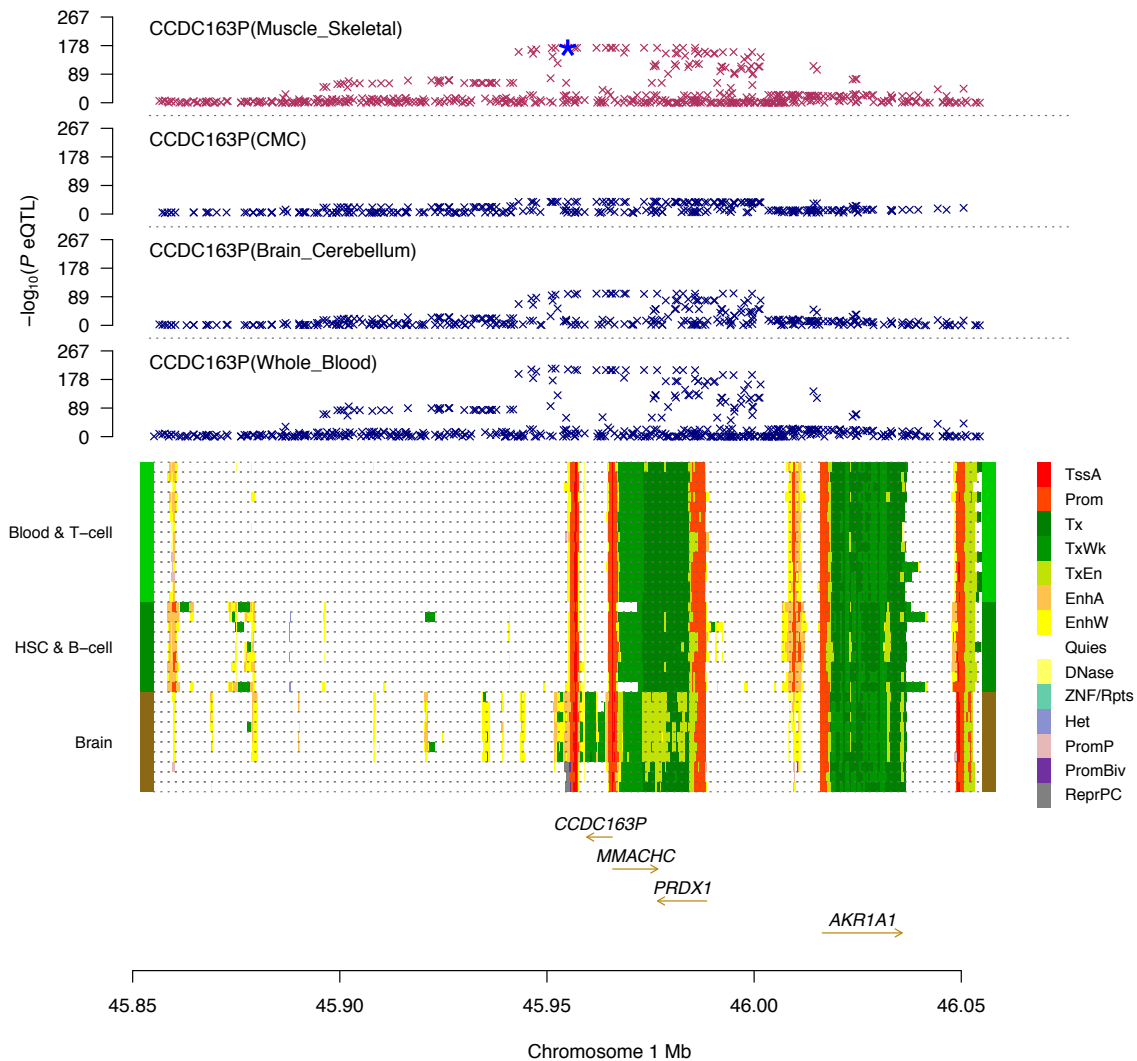

**Supplementary Figure 14** Shown is an example where a top cis-eQTL with tissue-specific effect is located in an enhancer region. The top eQTL was selected from GTEx-muscle at  $P_{\text{eQTL}} < 5 \times 10^{-8}$ . Showing in the top four plots are  $-\log_{10}(P \text{ values})$  for eQTLs of all the cis-SNPs for gene *CCDC163P* in GTEx-muscle, CMC, GTEx-cerebellum, and GTEx-blood respectively. Each row represents a REMC sample. The blue asterisk in the top plot indicates the top eQTL which co-localizes a tissue-specific enhancer region in brain. The bottom plot shows 14 chromatin state annotations (indicated by different colours) of the region derived from the Roadmap Epigenomics Mapping Consortium (REMC) (**Methods**). TssA, active transcription start site; Prom, upstream/downstream TSS promoter; Tx, actively transcribed state; TxWk, weak transcription; TxEn, transcribed and regulatory Prom/Enh; EnhA, active enhancer; EnhW, weak enhancer; DNase, primary DNase; ZNF/Rpts, state associated with zinc finger protein genes; Het, constitutive heterochromatin; PromP, Poised promoter; PromBiv, bivalent regulatory states; ReprPC, repressed Polycomb states; and Quies, a quiescent state.

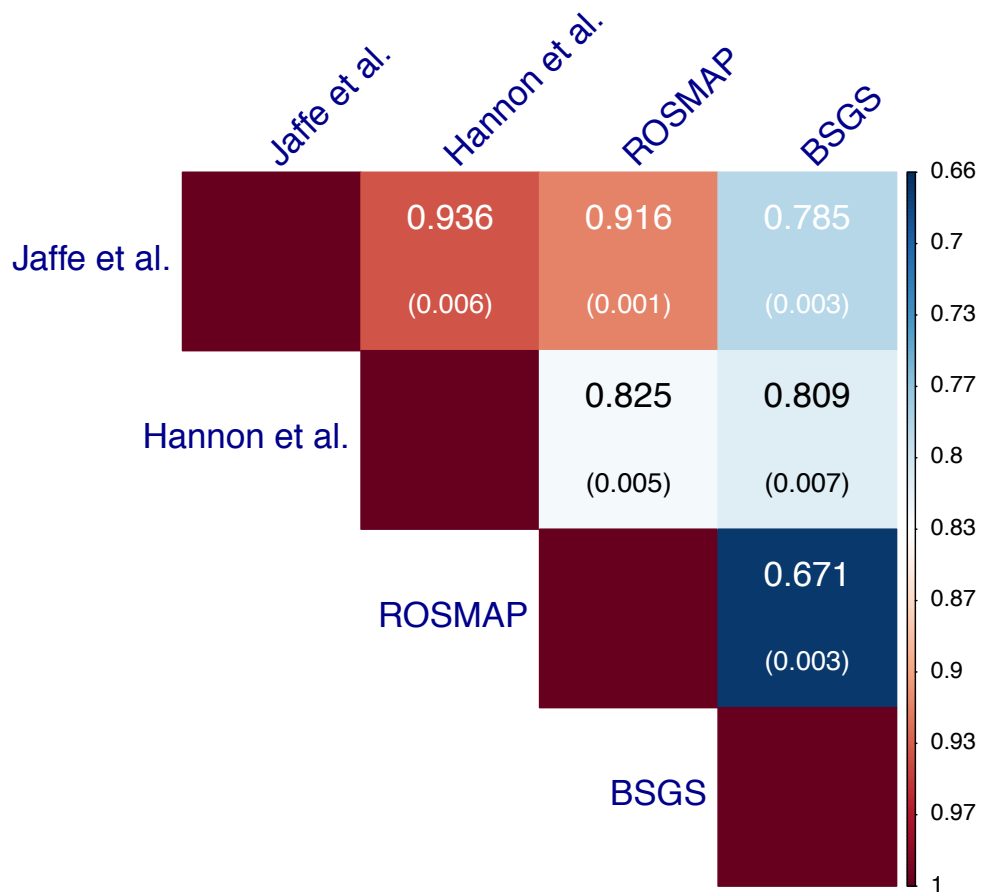

**Supplementary Figure 15** Estimated  $r_b$  of cis-mQTLs between brain and blood in different samples. The top cis-mQTLs were ascertained in LBC at  $P_{\text{mQTL}} < 5 \times 10^{-8}$ . In the ROSMAP data, only SNPs within 5Kb of the DNAm probes were available which might result in a downward bias of the  $r_b$  estimate.



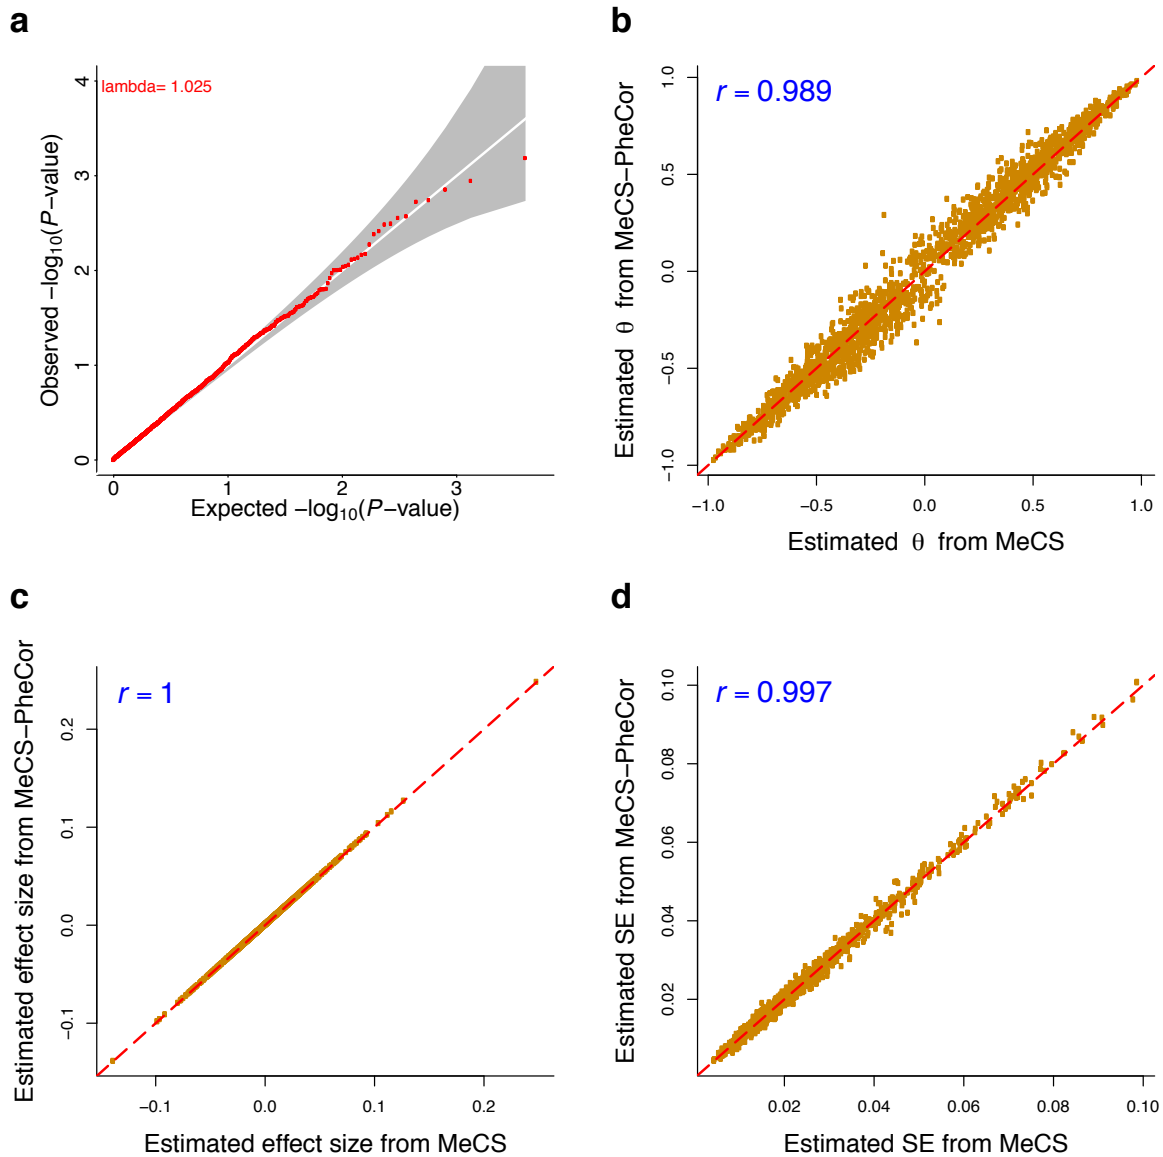

**Supplementary Figure 16** MeCS results from simulations under the null hypothesis that there is no cis-eQTL effect. MeCS-PheCor represents a MeCS analysis where correlation of estimation error ( $\theta$ ) is estimated by phenotypic correlation from individual-level data. **a** Quantile-quantile plot for MeCS under the null model. **b** Estimated  $\theta$  from summary data vs. that from individual-level data (sample overlap = 1). **c** Estimated effect size from MeCS vs. that from MeCS-PheCor. **d** Estimated SE from MeCS vs. that from MeCS-PheCor. Red dash lines in panel **b**, **c**, and **d** represent the diagonal lines ( $y = x$ ).

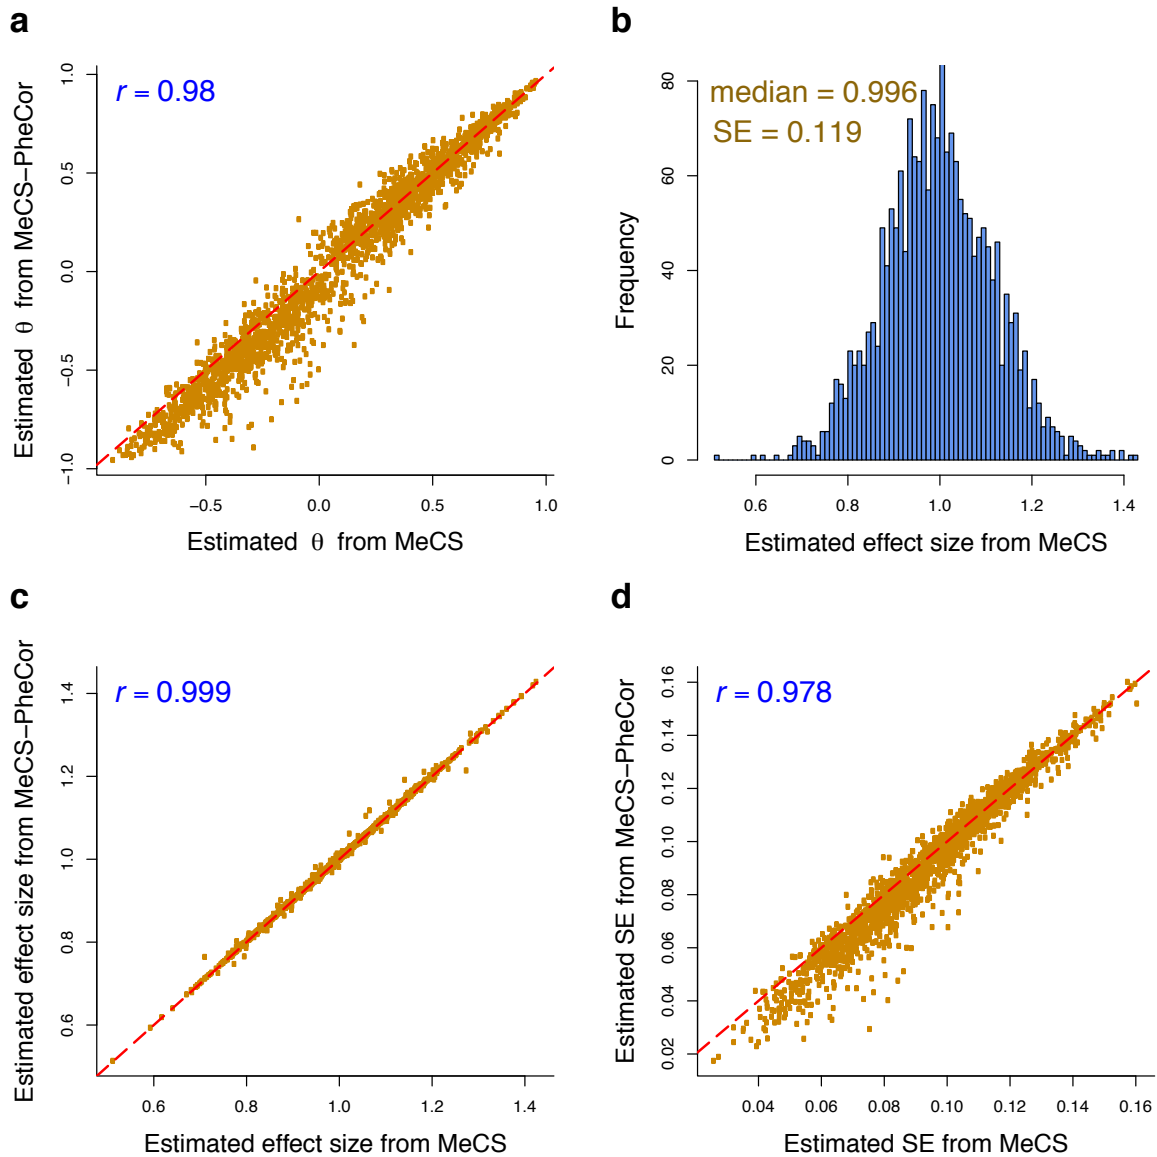

**Supplementary Figure 17** MeCS results from simulations under the alternative hypothesis that the eQTL effects are non-zero and vary across tissues. MeCS-PheCor represents a MeCS analysis where  $\theta$  is estimated from individual-level data. **a** Estimated  $\theta$  from summary-level data vs. that from individual-level data. **b** Distribution of estimated meta-analysis effect size from MeCS. **c** Estimated meta-analysis effect size from MeCS vs. that from MeCS-PheCor. **d** Estimated SE from MeCS vs. that from MeCS-PheCor. Red dash lines in panel **a**, **c**, and **d** represent the diagonal lines ( $y = x$ ).

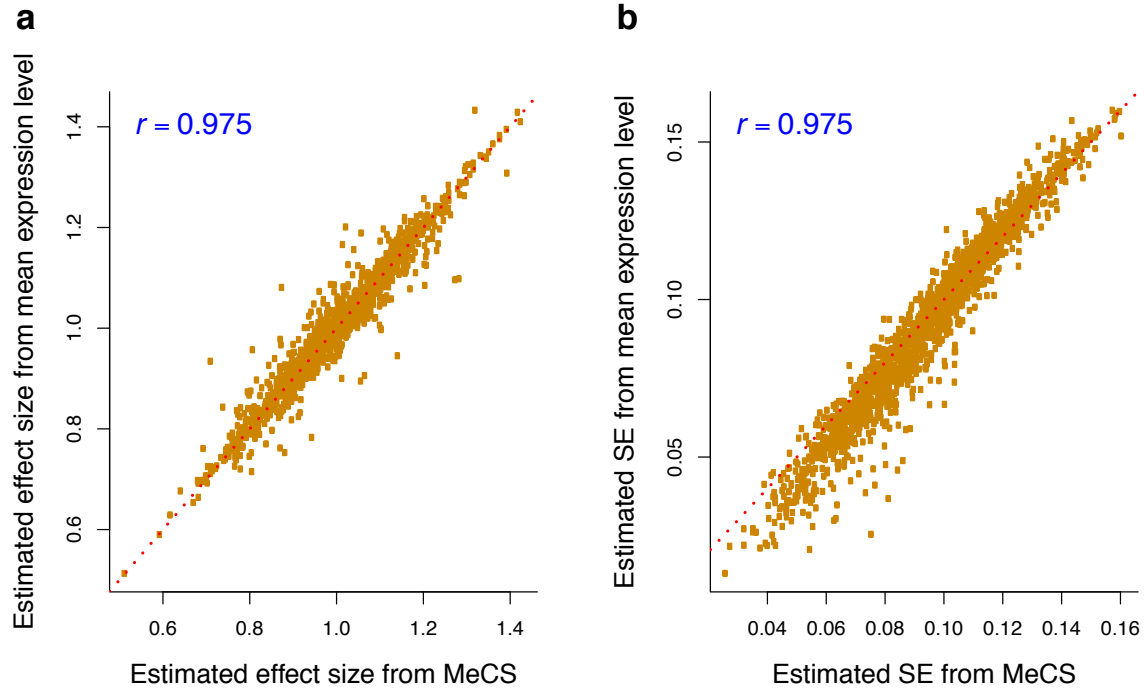

**Supplementary Figure 18** Estimates of eQTL effects and SE from MeCS vs. those from univariate analysis of mean expression level. In the analysis of mean expression level, we performed a standard GWAS analysis of the mean gene expression level of two tissues. **a** Meta-analysis effect size from MeCS vs. that from a univariate analysis of mean expression level. **b** Estimated SE from MeCS vs. that from a univariate analysis of mean expression level. Red dash lines represent the diagonal lines ( $y = x$ ).

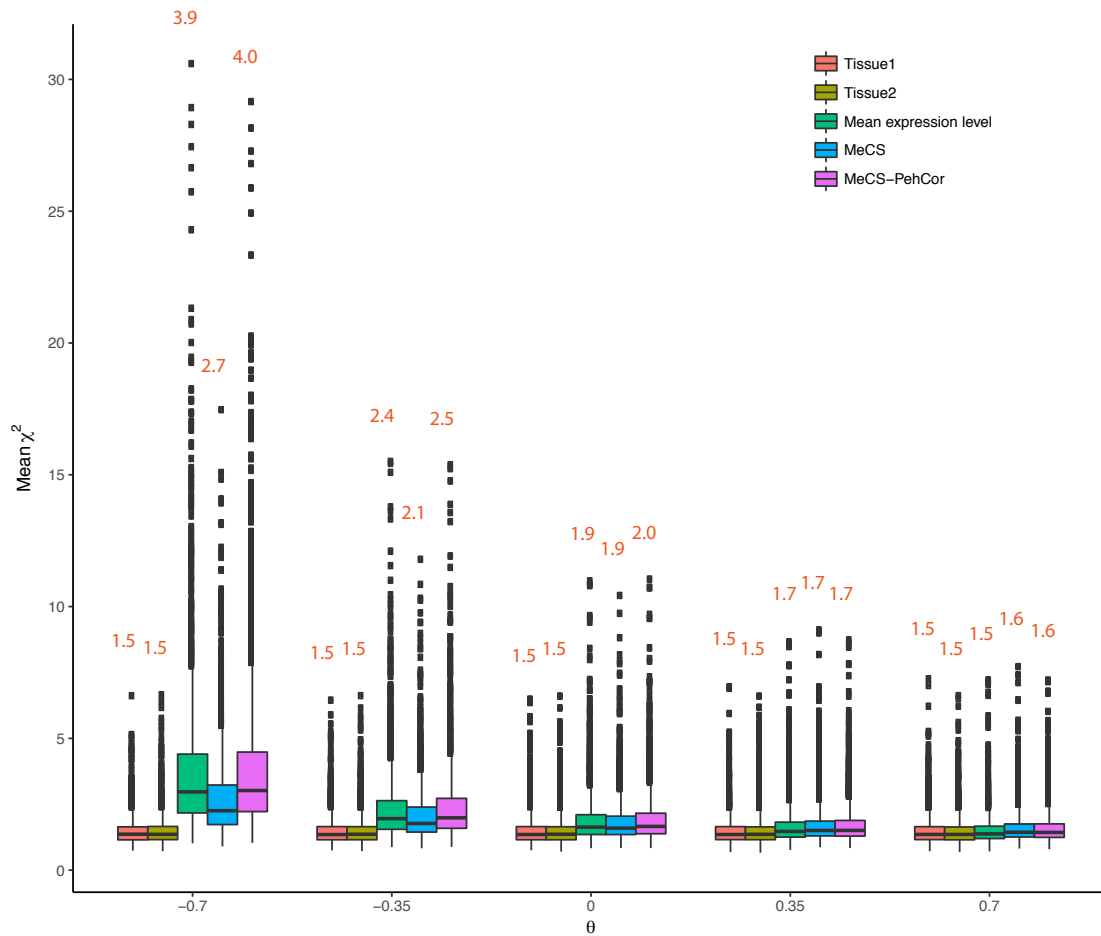

**Supplementary Figure 19** Mean  $\chi^2$  across all eQTLs under different levels of  $\theta$  (-0.70, -0.35, 0, 0.35 and 0.70). Each column is a box-plot of the mean  $\chi^2$  values from 1,000 simulation replicates under different levels of  $\theta$ . The mean value of each column is labelled in red. Tissue 1 and Tissue 2: single-tissue analyses. Mean expression level: a univariate analysis of the mean expression level of two tissues. MeCS-PheCor: MeCS analysis with  $\theta$  estimated from individual-level data (sample overlap = 1).

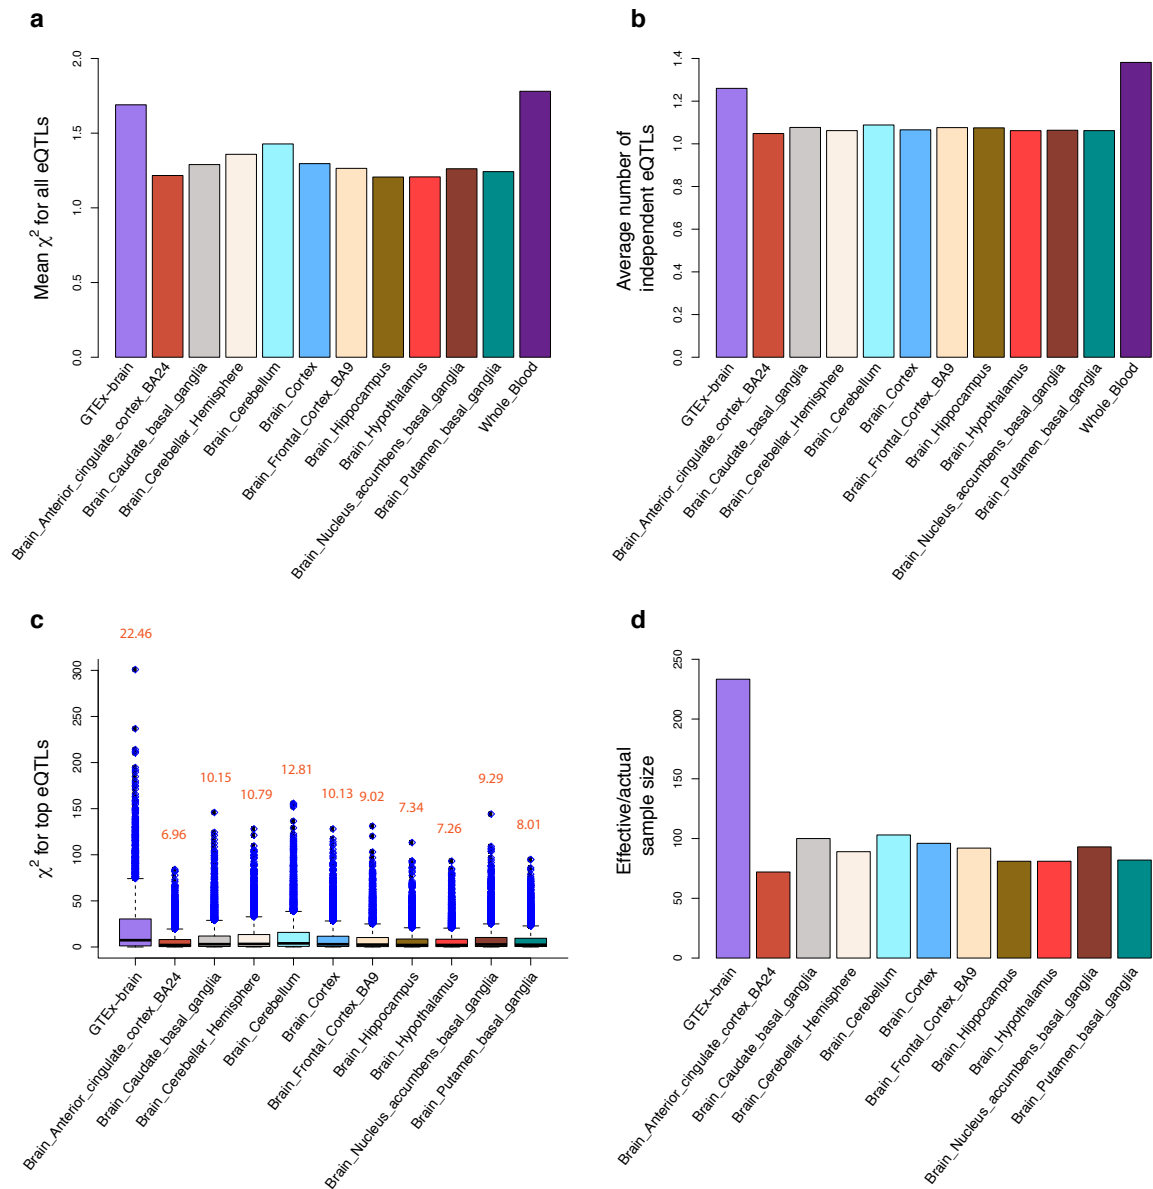

**Supplementary Figure 20** MeCS analysis of the 10 GTEx brain regions. **a** Average mean  $\chi^2$  for all eQTLs across all probes from GTEx-brain, 10 brain regions individually, and GTEx-blood. Note that GTEx-brain represents a MeCS analysis of 10 GTEx brain regions. **b** Average number of independent significant eQTLs (from PLINK clumping analysis) per gene in GTEx-brain, 10 brain regions individually, and GTEx-blood. **c** Box-plots of the  $\chi^2$  values of the top cis-eQTLs in GTEx-brain and 10 GTEx brain regions where the top cis-eQTLs were ascertained in GTEx-blood at  $P < 5 \times 10^{-8}$ . The mean value of each column is labelled in red. **d** Effective/actual sample size for GTEx-brain and 10 brain regions.

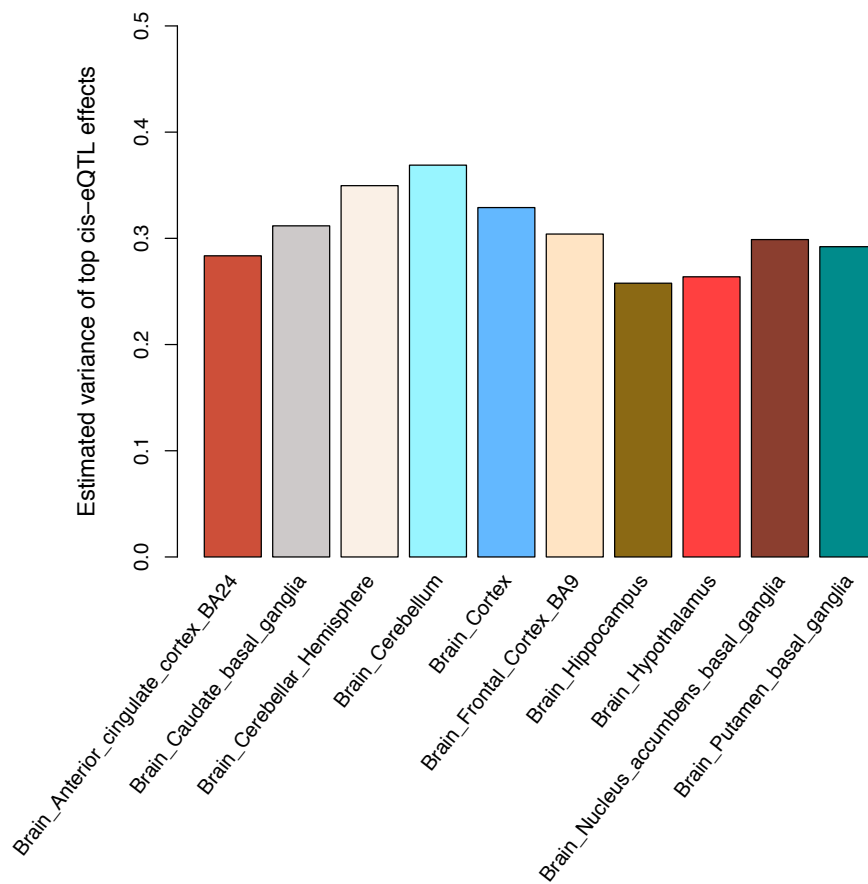

**Supplementary Figure 21** Estimated variance of top cis-eQTL effects across genes in each brain region in GTEx. The top cis-eQTLs for 4,257 genes (a cis-eQTL per gene) were selected at  $P < 5 \times 10^{-8}$  in GTEx-muscle. The variance of SNP effects was estimated by an approximate approach  $\widehat{\text{var}}(b) \approx \widehat{\text{var}}(\hat{b}) - \widehat{\text{mean}}(\text{SE}^2)$  where  $\widehat{\text{var}}$  and  $\widehat{\text{mean}}$  denote the sample variance and mean across genes, respectively.

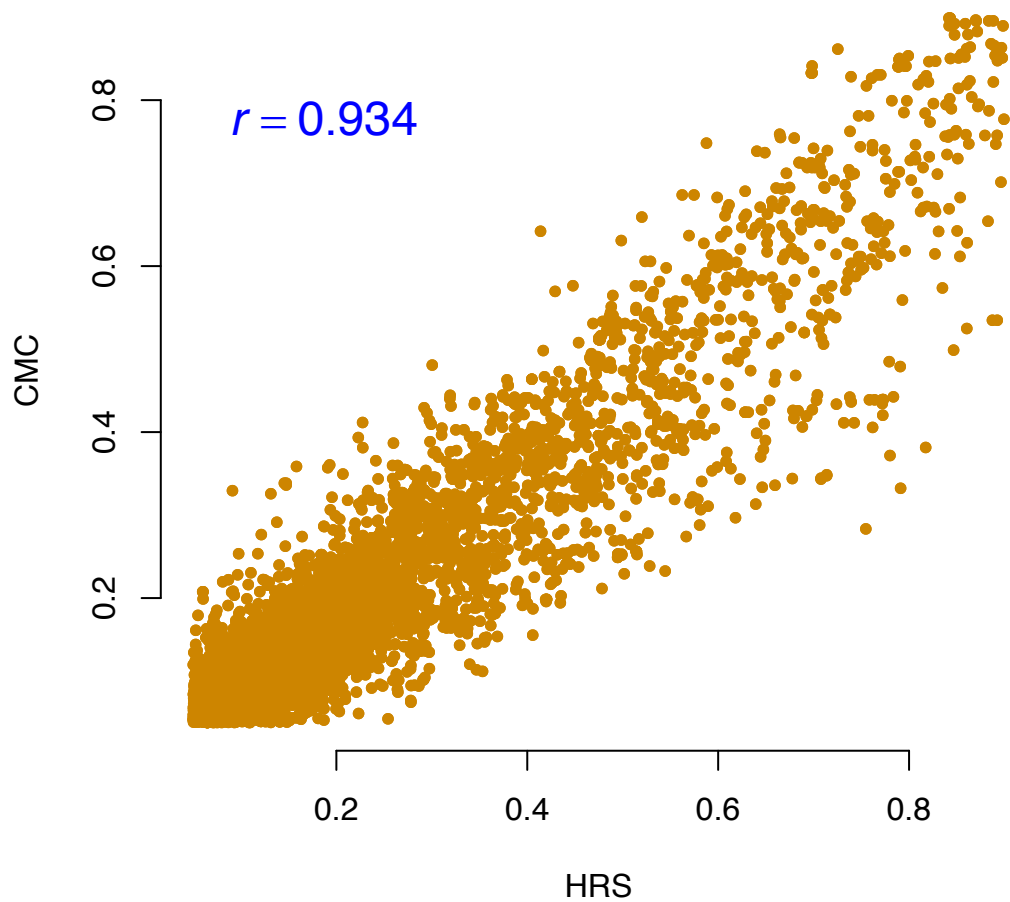

**Supplementary Figure 22** Relationship of LD  $r^2$  between CMC and the Health and Retirement Study (HRS). HRS is used as the reference sample in HEIDI test for LD estimation. Shown are the LD  $r^2$  between 1,500 pairs of adjacent common SNPs on chromosome 22 estimated in the CMC ( $n = 621$ ) and HRS data ( $n = 7,703$  European Americans). Both x- and y-axes are limited to the range between 0.05 and 0.9 because the HEIDI test only uses LD within this range. There are observable differences in LD due to sampling because of finite sample sizes. These differences might lead to an increased rejection rate for HEIDI but not affecting the false discovery rate of the SMR & HEIDI analysis.

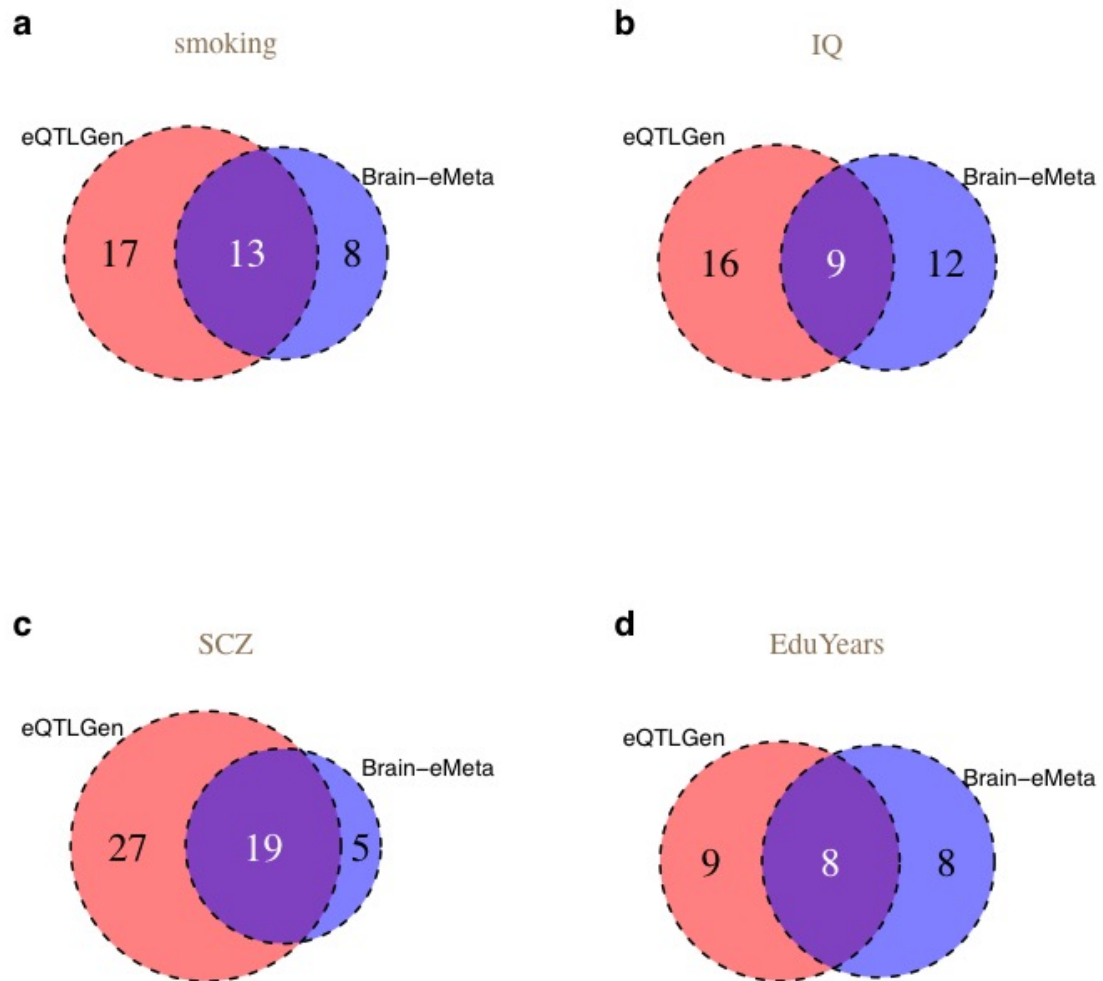

**Supplementary Figure 23** Number of genes associated with smoking (**a**), IQ (**b**), SCZ (**c**), and EduYears (**d**) in eQTLGen (blood) and Brain-eMeta (brain). The genes were identified by the SMR analysis using GWAS and eQTL summary data.



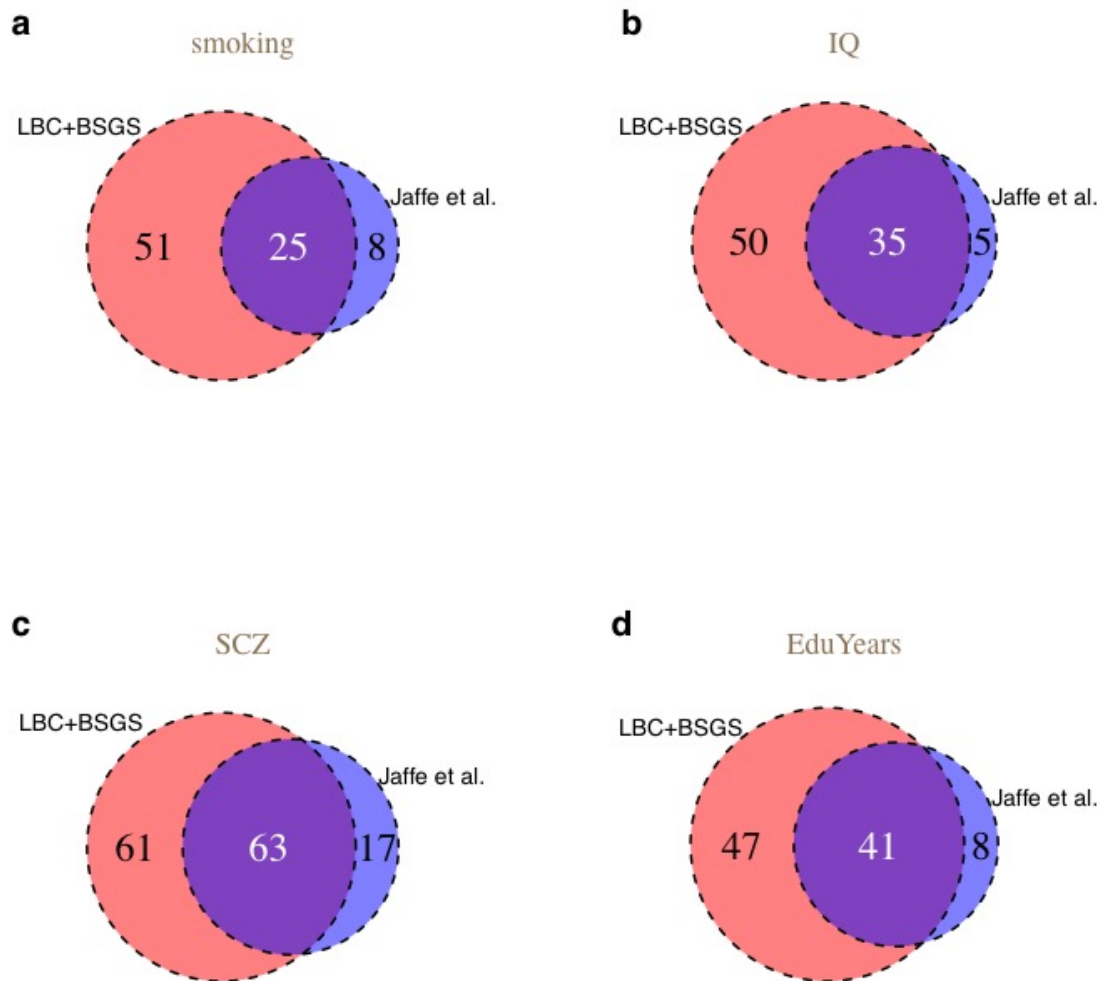

**Supplementary Figure 24** Number of DNAm sites associated with smoking (**a**), IQ (**b**), SCZ (**c**), and EduYears (**d**) in LBC+BSGS (blood) and Jaffe et al. (brain). The DNAm sites were identified by the SMR analysis using GWAS and mQTL summary data.

**a**

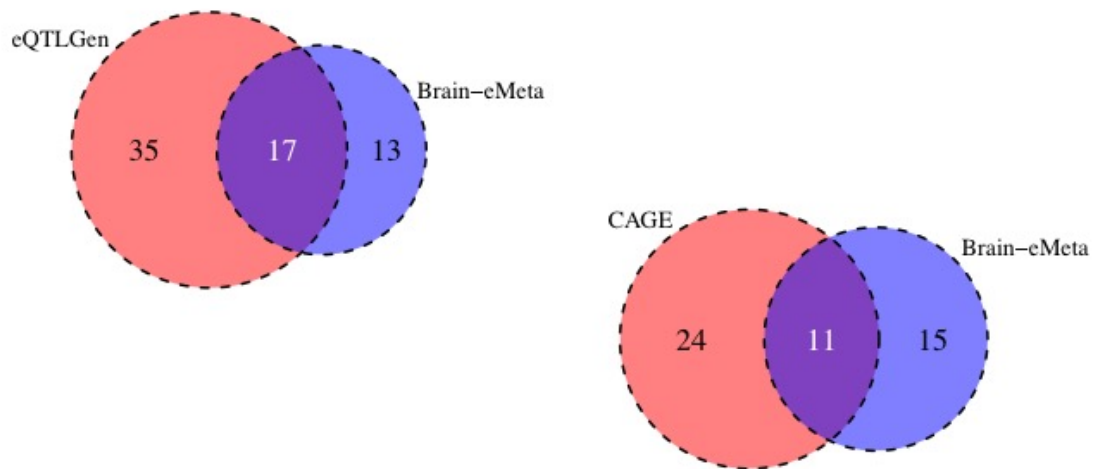

**b**

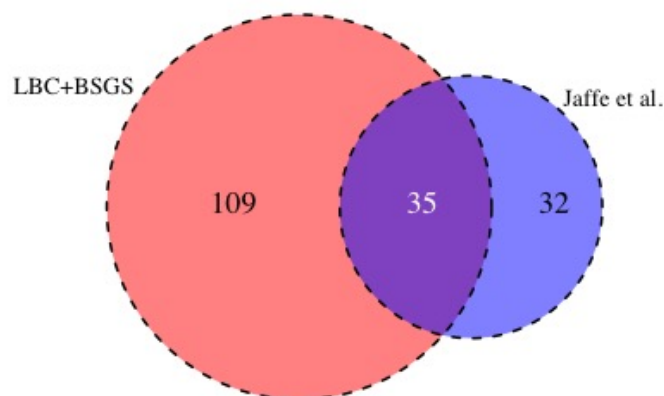

**Supplementary Figure 25** Number of genes (**a**) and DNAm sites (**b**) showed pleiotropy effects ( $P_{\text{SMR}} < 1.8 \times 10^{-6}$  and  $P_{\text{HEIDI}} > 0.05$ ) with 4 brain-related traits by an integrative analysis of GWAS data with eQTL (mQTL) data from brain and blood samples using the SMR & HEIDI approach. The four brain-related traits are smoking, IQ, SCZ and EduYears.

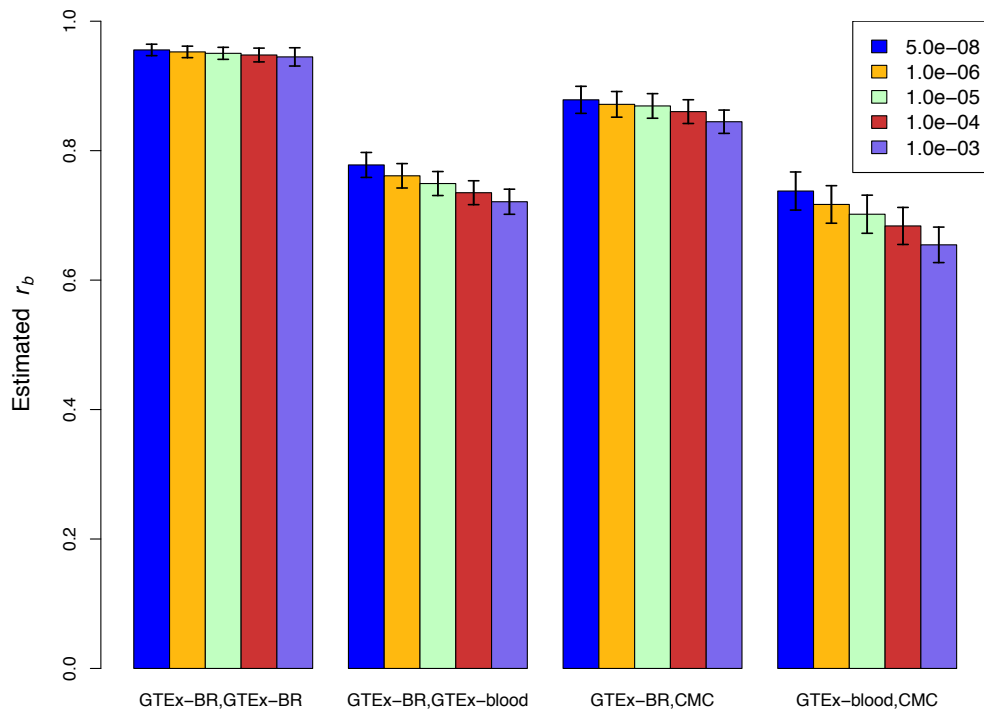

**Supplementary Figure 26** Estimates of  $r_b$  between two tissues for cis-eQTLs selected at different thresholds from the reference tissue. Each analysis involves three tissues, one tissue as the reference for selecting the top associated cis-eQTLs and the other two tissues for the estimation of  $r_b$ . GTEX-muscle was used as the reference tissue to select the top associated cis-eQTLs at 5 different thresholds (i.e. 5.0e-08, 1.0e-06, 1.0e-05, 1.0e-04, and 1.0e-03). GTEX-BR, GTEX-BR: mean estimate of  $r_b$  from pairwise brain regions in GTEX. GTEX-BR, GTEX-blood: mean estimate of  $r_b$  between blood and 10 brain regions in GTEX. GTEX-BR, CMC: mean estimate of  $r_b$  between CMC and 10 brain regions in GTEX. GTEX-blood, CMC: estimate of  $r_b$  between GTEX-blood and CMC.

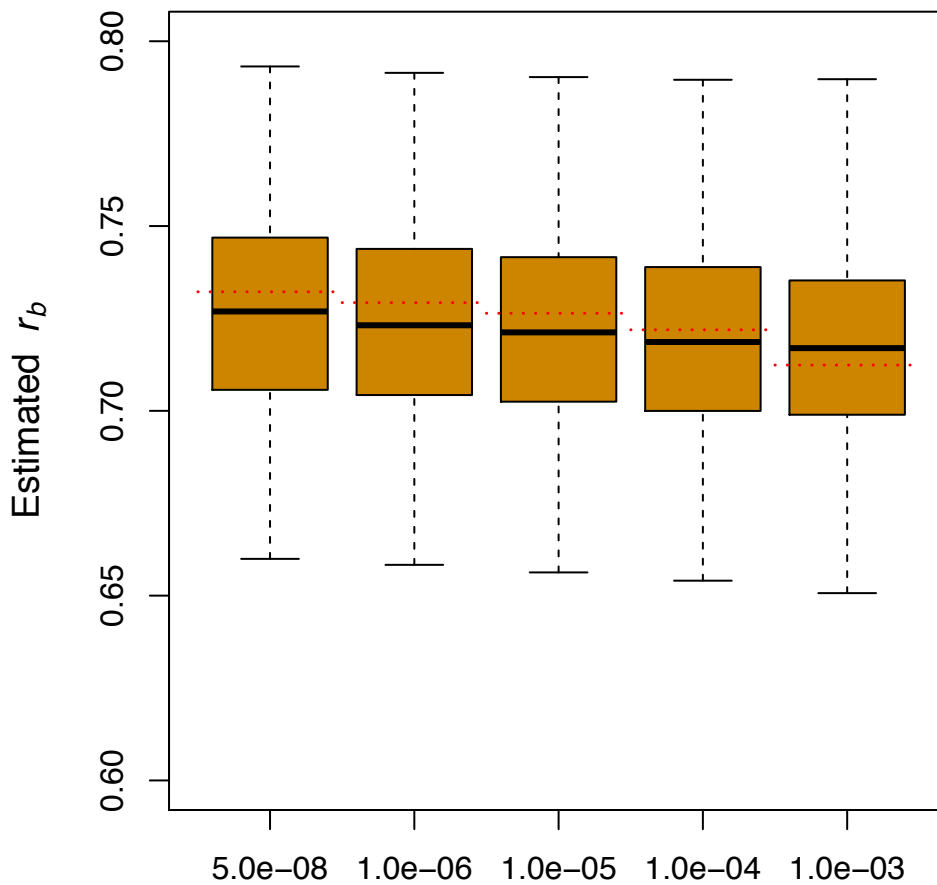

**Supplementary Figure 27** Estimates of  $r_b$  between two tissues for cis-eQTLs selected at different p-value thresholds in the reference tissue. The gene expression levels in three tissues were simulated based on the UK10K data set with the SNPs in common with HapMap3 (See **Supplementary Note 1** for details). In each simulation replicate, we generated 1,000 probes. The true SNP effects were generated from a multivariate normal distribution with a correlation parameter of 0.7 and the residues in gene expression levels were also simulated from a multivariate normal distribution with a correlation parameter of 0.20 between tissues (**Supplementary Note 1**). The first tissue was used as the reference for selecting the top associated cis-eQTLs at a p-value threshold and the other two tissues were used to estimate  $r_b$  at the selected cis-eQTLs. Each box represents the distribution of estimates from 100 simulation replicates. The red dash lines represent the correlation of the true effects generated from the simulation for the corresponding selected probes.

**Supplementary Table 1** eQTL summary data

| <b>Data set</b>  | <b>Tissue</b>                          | <b><i>n</i></b> | <b>Data type</b> | <b><i>m</i></b> | <b>No. of probes and/or genes</b> |
|------------------|----------------------------------------|-----------------|------------------|-----------------|-----------------------------------|
| GTE <sub>x</sub> | Brain, anterior cingulate cortex BA24  | 72              | RNA-Seq          | 5,815,921       | 23,509                            |
| GTE <sub>x</sub> | Brain, hippocampus                     | 81              | RNA-Seq          | 6,110,317       | 23,880                            |
| GTE <sub>x</sub> | Brain, hypothalamus                    | 81              | RNA-Seq          | 6,097,172       | 24,654                            |
| GTE <sub>x</sub> | Brain, putamen basal ganglia           | 82              | RNA-Seq          | 6,143,910       | 23,362                            |
| GTE <sub>x</sub> | Brain, cerebellar hemisphere           | 89              | RNA-Seq          | 6,241,253       | 24,065                            |
| GTE <sub>x</sub> | Brain, frontal cortex BA9              | 92              | RNA-Seq          | 6,381,609       | 24,120                            |
| GTE <sub>x</sub> | Brain, nucleus accumbens basal ganglia | 93              | RNA-Seq          | 6,406,794       | 24,542                            |
| GTE <sub>x</sub> | Brain, cortex                          | 96              | RNA-Seq          | 6,540,080       | 24,366                            |
| GTE <sub>x</sub> | Brain, caudate basal ganglia           | 100             | RNA-Seq          | 6,573,031       | 24,621                            |
| GTE <sub>x</sub> | Brain, cerebellum                      | 103             | RNA-Seq          | 6,554,532       | 24,762                            |
| GTE <sub>x</sub> | Whole blood                            | 338             | RNA-Seq          | 9,206,530       | 23,164                            |
| CMC <sup>a</sup> | Dorsolateral prefrontal cortex         | 467             | RNA-Seq          | 1,102,001       | 14,366                            |
| ROSMAP           | Brain, cortex                          | 494             | RNA-Seq          | 6,440,707       | 12,979                            |
| Braineac         | 10 CNS tissues                         | 134             | Microarray       | 6,187,834       | 25,490                            |
| CAGE             | Peripheral blood                       | 2,765           | Microarray       | 7,763,174       | 38,624                            |
| eQTLGen          | Peripheral blood                       | 14,115          | Microarray       | 10,209,777      | 44,556                            |

We analyzed eQTL summary data spanning brain and blood from 6 datasets. 10 CNS tissues in Braineac are frontal cortex (FCTX), hippocampus (HIPPI), medulla (specifically inferior olivary nucleus, MEDU), occipital cortex (specifically primary visual cortex, OCTX), putamen (PUTM), substantia nigra (SNIG), thalamus (THAL), temporal cortex(TCTX), intralobular white matter (WHMT), and cerebellar cortex (CRBL). For each tissue, we listed the sample size, data type, number of SNPs, and number of probes and/or genes. <sup>a</sup>CMC, only SNP-gene pairs at FDR < 0. 20 were available in the public domain. For the other data sets, we had the full eQTL associations in the cis-regions. *n*: sample size; *m*: number of SNPs.

**Supplementary Table 2** Number of matched genes out of 4,257 selected from GTEx-muscle between different data sets

| Data set 1   | Data set 2    | No. of matched genes | Data set 1    | Data set 2    | No. of matched genes |
|--------------|---------------|----------------------|---------------|---------------|----------------------|
| GTEEx-brain1 | GTEEx-brain2  | 3,726                | GTEEx-brain5  | GTEEx-brain6  | 3,827                |
| GTEEx-brain1 | GTEEx-brain3  | 3,652                | GTEEx-brain5  | GTEEx-brain7  | 3,782                |
| GTEEx-brain1 | GTEEx-brain4  | 3,682                | GTEEx-brain5  | GTEEx-brain8  | 3,794                |
| GTEEx-brain1 | GTEEx-brain5  | 3,735                | GTEEx-brain5  | GTEEx-brain9  | 3,819                |
| GTEEx-brain1 | GTEEx-brain6  | 3,735                | GTEEx-brain5  | GTEEx-brain10 | 3,771                |
| GTEEx-brain1 | GTEEx-brain7  | 3,717                | GTEEx-brain5  | GTEEx-blood   | 3,575                |
| GTEEx-brain1 | GTEEx-brain8  | 3,716                | GTEEx-brain5  | CMC           | 1,436                |
| GTEEx-brain1 | GTEEx-brain9  | 3,720                | GTEEx-brain5  | ROSMAP        | 2,227                |
| GTEEx-brain1 | GTEEx-brain10 | 3,700                | GTEEx-brain5  | Braineac      | 2,191                |
| GTEEx-brain1 | GTEEx-blood   | 3,468                | GTEEx-brain6  | GTEEx-brain7  | 3,775                |
| GTEEx-brain1 | CMC           | 1,415                | GTEEx-brain6  | GTEEx-brain8  | 3,788                |
| GTEEx-brain1 | ROSMAP        | 2,186                | GTEEx-brain6  | GTEEx-brain9  | 3,804                |
| GTEEx-brain1 | Braineac      | 2,142                | GTEEx-brain6  | GTEEx-brain10 | 3,765                |
| GTEEx-brain2 | GTEEx-brain3  | 3,738                | GTEEx-brain6  | GTEEx-blood   | 3,546                |
| GTEEx-brain2 | GTEEx-brain4  | 3,776                | GTEEx-brain6  | CMC           | 1,434                |
| GTEEx-brain2 | GTEEx-brain5  | 3,827                | GTEEx-brain6  | ROSMAP        | 2,213                |
| GTEEx-brain2 | GTEEx-brain6  | 3,809                | GTEEx-brain6  | Braineac      | 2,176                |
| GTEEx-brain2 | GTEEx-brain7  | 3,787                | GTEEx-brain7  | GTEEx-brain8  | 3,772                |
| GTEEx-brain2 | GTEEx-brain8  | 3,809                | GTEEx-brain7  | GTEEx-brain9  | 3,776                |
| GTEEx-brain2 | GTEEx-brain9  | 3,841                | GTEEx-brain7  | GTEEx-brain10 | 3,751                |
| GTEEx-brain2 | GTEEx-brain10 | 3,793                | GTEEx-brain7  | GTEEx-blood   | 3,532                |
| GTEEx-brain2 | GTEEx-blood   | 3,581                | GTEEx-brain7  | CMC           | 1,430                |
| GTEEx-brain2 | CMC           | 1,438                | GTEEx-brain7  | ROSMAP        | 2,208                |
| GTEEx-brain2 | ROSMAP        | 2,227                | GTEEx-brain7  | Braineac      | 2,174                |
| GTEEx-brain2 | Braineac      | 2,192                | GTEEx-brain8  | GTEEx-brain9  | 3,799                |
| GTEEx-brain3 | GTEEx-brain4  | 3,776                | GTEEx-brain8  | GTEEx-brain10 | 3,763                |
| GTEEx-brain3 | GTEEx-brain5  | 3,729                | GTEEx-brain8  | GTEEx-blood   | 3,550                |
| GTEEx-brain3 | GTEEx-brain6  | 3,721                | GTEEx-brain8  | CMC           | 1,430                |
| GTEEx-brain3 | GTEEx-brain7  | 3,702                | GTEEx-brain8  | ROSMAP        | 2,205                |
| GTEEx-brain3 | GTEEx-brain8  | 3,717                | GTEEx-brain8  | Braineac      | 2,191                |
| GTEEx-brain3 | GTEEx-brain9  | 3,732                | GTEEx-brain9  | GTEEx-brain10 | 3,782                |
| GTEEx-brain3 | GTEEx-brain10 | 3,692                | GTEEx-brain9  | GTEEx-blood   | 3,562                |
| GTEEx-brain3 | GTEEx-blood   | 3,521                | GTEEx-brain9  | CMC           | 1,435                |
| GTEEx-brain3 | CMC           | 1,425                | GTEEx-brain9  | ROSMAP        | 2,224                |
| GTEEx-brain3 | ROSMAP        | 2,209                | GTEEx-brain9  | Braineac      | 2,186                |
| GTEEx-brain3 | Braineac      | 2,156                | GTEEx-brain10 | GTEEx-blood   | 3,522                |
| GTEEx-brain4 | GTEEx-brain5  | 3,781                | GTEEx-brain10 | CMC           | 1,425                |
| GTEEx-brain4 | GTEEx-brain6  | 3,750                | GTEEx-brain10 | ROSMAP        | 2,213                |
| GTEEx-brain4 | GTEEx-brain7  | 3,731                | GTEEx-brain10 | Braineac      | 2,174                |
| GTEEx-brain4 | GTEEx-brain8  | 3,744                | GTEEx-blood   | CMC           | 1,388                |
| GTEEx-brain4 | GTEEx-brain9  | 3,773                | GTEEx-blood   | ROSMAP        | 2,209                |
| GTEEx-brain4 | GTEEx-brain10 | 3,721                | GTEEx-blood   | Braineac      | 2,526                |
| GTEEx-brain4 | GTEEx-blood   | 3,569                | CMC           | ROSMAP        | 1,043                |
| GTEEx-brain4 | CMC           | 1,431                | CMC           | Braineac      | 1,113                |
| GTEEx-brain4 | ROSMAP        | 2,225                | ROSMAP        | Braineac      | 1,354                |
| GTEEx-brain4 | Braineac      | 2,177                |               |               |                      |

We selected the top associated cis-eQTLs at  $P_{\text{eQTL}} < 5 \times 10^{-8}$  for 4,257 genes in GTEx-muscle and matched those selected cis-eQTLs and genes with other data sets. GTEEx-brain1 – GTEEx-brain10 represent 10 brain regions in GTEx: brain-anterior cingulate cortex BA24, brain-caudate basal ganglia, brain-cerebellar hemisphere, brain-cerebellum, brain-cortex, brain-frontal cortex BA9, brain-hippocampus, brain-hypothalamus, brain-nucleus accumbens basal ganglia, and brain-putamen basal ganglia.

**Supplementary Table 3** mQTL summary data

| <b>Data set</b>            | <b>Tissue</b>    | <b><i>n</i></b> | <b><i>m</i></b> | <b>No. of probes</b> |
|----------------------------|------------------|-----------------|-----------------|----------------------|
| ROSMAP <sup>a</sup>        | Brain cortical   | 468             | 5,211,394       | 417,700              |
| Hannon et al. <sup>b</sup> | Fetal brain      | 166             | 312,180         | 26,840               |
| Jaffe et al. <sup>c</sup>  | Frontal cortex   | 526             | 1,544,693       | 138,917              |
| LBC                        | peripheral blood | 1,366           | 9,183,310       | 448,554              |
| BSGS                       | peripheral blood | 614             | 7,856,389       | 417,059              |
| LBC+BSGS                   | peripheral blood | 1,980           | 7,664,968       | 397,621              |

All 5 datasets were based on the Illumina HumanMethylation450K array. <sup>a</sup>ROSMAP, only SNPs within 5Kb of the DNAm probes were available; <sup>b</sup>Hannon et al., only SNPs with  $P_{\text{mQTL}} < 1 \times 10^{-10}$  were available; <sup>c</sup>Jaffe et al., only SNPs with FDR < 0.1 (corresponding to  $P_{\text{mQTL}} < 8.6 \times 10^{-4}$ ) were available; ***n***: sample size; ***m***: number of SNPs.

**Supplementary Table 4** Number of matched DNAm probes between different data sets

| <b>Data set 1</b> | <b>Data set 2</b> | <b>No. of matched probes</b> |
|-------------------|-------------------|------------------------------|
| BSGS              | LBC               | 6,561                        |
| BSGS              | Jaffe et al.      | 5,267                        |
| BSGS              | ROSMAP            | 5,809                        |
| LBC               | Jaffe et al.      | 5,416                        |
| LBC               | ROSMAP            | 6,057                        |
| Jaffe et al.      | ROSMAP            | 4,892                        |

We selected the top associated cis-mQTLs at  $P_{\text{mQTL}} < 1 \times 10^{-10}$  for 26,840 DNAm probes in the data from Hannon et al. and matched those selected cis-mQTLs and DNAm probes with other DNAm data sets.



**Supplementary Table 5** *P* value of fold enrichment for tissue-specific mQTLs in each functional category

| Category | No. of mQTLs | Fold enrichment | SE    | <i>t</i> | <i>P</i> value         |
|----------|--------------|-----------------|-------|----------|------------------------|
| TssA     | 140          | 0.630           | 0.122 | -3.033   | 1.45×10 <sup>-3</sup>  |
| Prom     | 655          | 0.916           | 0.059 | -1.424   | 7.76×10 <sup>-2</sup>  |
| Tx       | 546          | 1.035           | 0.081 | 0.432    | 3.33×10 <sup>-1</sup>  |
| TxWk     | 331          | 1.155           | 0.124 | 1.25     | 1.06×10 <sup>-1</sup>  |
| TxEn     | 254          | 1.570           | 0.181 | 3.149    | 9.17×10 <sup>-4*</sup> |
| EnhA     | 99           | 1.675           | 0.258 | 2.616    | 5.15×10 <sup>-3</sup>  |
| EnhW     | 250          | 1.416           | 0.168 | 2.476    | 6.97×10 <sup>-3</sup>  |
| DNase    | 75           | 1.663           | 0.405 | 1.637    | 5.29×10 <sup>-2</sup>  |
| ZNFRpts  | 15           | 0.876           | 0.296 | -0.419   | 3.41×10 <sup>-1</sup>  |
| Het      | 57           | 0.835           | 0.162 | -1.018   | 1.56×10 <sup>-1</sup>  |
| PromP    | 40           | 0.682           | 0.211 | -1.507   | 6.99×10 <sup>-2</sup>  |
| PromBiv  | 168          | 0.869           | 0.151 | -0.867   | 1.94×10 <sup>-1</sup>  |
| ReprPC   | 353          | 0.757           | 0.074 | -3.284   | 5.65×10 <sup>-4</sup>  |
| Quies    | 2436         | 0.924           | 0.029 | -2.621   | 4.42×10 <sup>-3</sup>  |

$t = (\text{fold enrichment} - 1)/\text{SE}$ ; *P* value is estimated from *t*-distribution. The red asterisk indicated significant enrichment of  $T_D$  after the correction for multiple testing ( $P < 0.05/14$ ).

**Supplementary Table 6** Summary data of GWAS

| <b>Phenotype</b> | <b><i>n</i></b> | <b><i>n</i><sub>case</sub></b> | <b><i>n</i><sub>control</sub></b> | <b>No. of SNPs</b> |
|------------------|-----------------|--------------------------------|-----------------------------------|--------------------|
| SCZ              | 150,064         | 36,989                         | 113,075                           | 9,444,231          |
| EduYears         | 293,723         | /                              | /                                 | 8,146,841          |
| smoking          | 453,693         | 208,988                        | 244,705                           | 7,288,503          |
| IQ               | 146,819         | /                              | /                                 | 7,288,503          |

We included 4 brain-related complex traits in the analysis. GWAS summary statistics for SCZ and EduYears were from the latest meta-analyses, and summary data for smoking and IQ were from GWAS analysis in the latest release of the UK Biobank (**Methods**). *n*: sample size; *n*<sub>case</sub>: number of cases; *n*<sub>control</sub>: number of controls.

**Supplementary Table 7** Replication rate of top eQTLs selected from muscle in different tissues or datasets

| <b>Data set</b>  | <b>Tissue</b>                          | <b><i>n</i></b> | <b><i>m</i></b> | <b><math>5 \times 10^{-8}</math></b> | <b><math>\pi_1</math></b> |
|------------------|----------------------------------------|-----------------|-----------------|--------------------------------------|---------------------------|
| GTE <sub>x</sub> | Brain, Anterior cingulate cortex BA24  | 72              | 3,740           | 0.115                                | 0.578                     |
| GTE <sub>x</sub> | Brain, hippocampus                     | 81              | 3,810           | 0.107                                | 0.599                     |
| GTE <sub>x</sub> | Brain, hypothalamus                    | 81              | 3,860           | 0.116                                | 0.599                     |
| GTE <sub>x</sub> | Brain, putamen basal ganglia           | 82              | 3,801           | 0.131                                | 0.625                     |
| GTE <sub>x</sub> | Brain, cerebellar hemisphere           | 89              | 3,759           | 0.178                                | 0.650                     |
| GTE <sub>x</sub> | Brain, frontal cortex BA9              | 92              | 3,844           | 0.148                                | 0.622                     |
| GTE <sub>x</sub> | Brain, nucleus accumbens basal ganglia | 93              | 3,871           | 0.148                                | 0.626                     |
| GTE <sub>x</sub> | Brain, cortex                          | 96              | 3,831           | 0.171                                | 0.657                     |
| GTE <sub>x</sub> | Brain, caudate basal ganglia           | 100             | 3,884           | 0.162                                | 0.649                     |
| GTE <sub>x</sub> | Brain, cerebellum                      | 103             | 3,852           | 0.210                                | 0.700                     |
| GTE <sub>x</sub> | Whole blood                            | 338             | 3,821           | 0.292                                | 0.715                     |
| CMC              | Dorsolateral Prefrontal Cortex         | 467             | 2,024           | 0.528                                | 0.988                     |
| Braineac         | aveALL <sup>a</sup>                    | 134             | 2,275           | 0.056                                | 0.424                     |

<sup>a</sup>aveALL represents eQTLs associated with average gene expression across 10 brain regions in Braineac. ***n***: sample size; ***m***: number of cis-eQTLs in common with those selected from GTE<sub>x</sub>-muscle;  **$5 \times 10^{-8}$** : replication rate at  $P < 5 \times 10^{-8}$ ;  **$\pi_1$**  (the proportion of true positive) was estimated using the method described in Storey et al.<sup>7</sup>.

### Supplementary Note 1: Simulation studies

We performed a series of simulations based on a whole-genome sequencing data from the UK10K project<sup>1</sup>. Details of the data and quantify control can be found elsewhere<sup>1</sup>. For simplicity, we limited the analysis to SNPs on chromosome 22 and those in common with HapMap3<sup>8</sup>, and further excluded SNPs with MAF < 0.01 or Hardy-Weinberg Equilibrium (HWE)  $P$  value <  $1 \times 10^{-6}$ . There were 16,805 SNPs and 3,642 unrelated individuals included in the simulation studies.

#### To investigate the unbiasedness of $r_b$ method

We performed simulations to investigate the unbiasedness of the  $r_b$  method. To this end, we randomly sampled a position on chromosome 22 and defined a  $\pm 2$ Mb window centered on the position as a cis-region. We randomly sampled a SNP in the cis-region as the causal variant. The genetic effects of the causal variant in three tissues (one tissue was used for selecting top associated cis-eQTLs, and the other two were used for estimating  $r_b$ ) were drawn from a

multivariate normal distribution,  $\mathbf{b} \sim MVN(\mathbf{0}, \begin{bmatrix} 1 & \rho_{12} & \rho_{13} \\ \rho_{12} & 1 & \rho_{23} \\ \rho_{13} & \rho_{23} & 1 \end{bmatrix})$ , with  $\rho$  being the correlation of

SNP effects between tissues. Correlation of estimation error ( $r_e$ ) may occur due to sample overlap and phenotype correlation, and therefore we generated residual error ( $\mathbf{e}$ ) in three tissues from a multivariate normal distribution,  $\mathbf{e} \sim MVN(\mathbf{0}, \mathbf{S})$ , where  $\mathbf{S}$  is the variance-covariance matrix. The  $ij$ -th element of  $\mathbf{S}$  is  $S_{ij} = r_e \sqrt{\text{var}(e_i)\text{var}(e_j)}$ , where  $\text{var}(e_i) = 2p(1-p)b_i^2(\frac{1}{q_i^2} - 1)$  with  $p$  being the MAF,  $b_i$  being the effect size of the causal variant in tissue  $i$ , and  $q_i^2$  being the proportion of variance in expression level of a gene explained by the causal variant. Five levels of  $r_e$  (0.1, 0.3, 0.5, 0.7, 0.9) were considered. Thus, gene expression levels in the three tissues for each of 3,642 individuals in our sample can be generated from a linear model  $\mathbf{Y} = \mathbf{X}\mathbf{b} + \mathbf{e}$ . eQTL effect size and SE in cis-region were estimated by a linear regression analysis of the simulated gene expression level for each SNP in each tissue. We repeated this process for 2,000 times to mimic the data for 2,000 genes. We then repeated the whole simulation with 100 replications for each level of  $r_e$ .

#### To investigate the unbiasedness of the MeCS method

To test performance of MeCS, we also conducted extensive simulations based on UK10K data under the null and alternative hypotheses pertaining to eQTL effect. We randomly sampled a gene position and a causal variant in cis-region using the same method as above (**Supplementary Note 1**). We set  $b = 1$ ,  $q^2 = 0.01$ , and simulated  $b_i = b + d_i$ , where  $b$  is the mean SNP effect across all tissues, and  $d_i$  is the deviation of SNP effect from  $b$  in tissue  $i$ ,  $d_i \sim N(0, 0.1)$ . For simplicity, we assumed that there are only 2 tissues. We can generate the expression level of a gene in the 2 tissues by a simple additive model  $\mathbf{Y} = \mathbf{X}\mathbf{b} + \mathbf{e}$  with different levels of  $\theta$ , where  $\mathbf{e}$  is

generated from a multivariate normal distribution,

$$\mathbf{e} \sim MVN(\mathbf{0}, \begin{bmatrix} \text{var}(e_i) & \theta \sqrt{\text{var}(e_i)\text{var}(e_j)} \\ \theta \sqrt{\text{var}(e_i)\text{var}(e_j)} & \text{var}(e_j) \end{bmatrix}).$$

We then performed simple regression

analyses to estimate eQTL effect sizes and SE for each SNP in each tissue. Furthermore, a null model (i.e.  $b = d_i = 0$ ) was used to assess type I error. Each simulation was replicated 1,000 times.

### Supplementary Note 2: Estimating effective sample size

We know from Yang et al.<sup>9</sup> that the effective sample size ( $n_{\text{eff}}$ ) can be calculated as

$$n_{\text{eff}} = (\chi^2 - 1) \frac{1 - q^2}{q^2}$$

where  $q^2$  is the proportion of variance in gene expression explained by the cis-eQTL. We selected the top cis-eQTLs from GTEx-blood at  $P < 5 \times 10^{-8}$ , and calculated the mean  $\chi^2$  value of these SNPs across 10 brain regions in GTEx. Assuming that  $q^2$  is similar across all brain regions,  $n_{\text{eff}}$  of the meta-analyzed GTEx-brain data can be estimated from the following equation

$$\frac{n_{\text{eff}_{\text{GTEx-brain}}}}{\bar{n}_{\text{brain\_region}}} = \frac{(\chi^2 - 1)_{\text{GTEx-brain}}}{(\chi^2 - 1)_{\text{brain\_region}}}$$

where  $\bar{n}_{\text{Brain}}$  is the mean sample size across all brain regions, and  $\overline{(\chi^2 - 1)}_{\text{brain\_region}}$  is the mean of mean  $\chi^2$  values across all brain regions.

### Supplementary Note 3: Acknowledgements

**HRS (dbGaP accession: phs000428.v1.p1):** HRS is supported by the National Institute on Aging (NIA U01AG009740). The genotyping was funded separately by the National Institute on Aging (RC2 AG036495, RC4 AG039029). Genotyping was conducted by the NIH Center for Inherited Disease Research (CIDR) at Johns Hopkins University. Genotyping quality control and final preparation of the data were performed by the Genetics Coordinating Center at the University of Washington.

**CMC (Synapse accession: syn2759792):** CMC data were generated as part of the CommonMind Consortium supported by funding from Takeda Pharmaceuticals Company Limited, F. Hoffman-La Roche Ltd and NIH grants R01MH085542, R01MH093725, P50MH066392, P50MH080405, R01MH097276, R01-MH-075916, P50M096891, P50MH084053S1, R37MH057881 and R37MH057881S1, HHSN271201300031C, AG02219, AG05138 and MH06692. Brain tissue for the study was obtained from the following brain bank collections: the Mount Sinai NIH Brain and Tissue Repository, the University of Pennsylvania Alzheimer's Disease Core Center, the

University of Pittsburgh NeuroBioBank and Brain and Tissue Repositories and the NIMH Human Brain Collection Core. CMC Leadership: Pamela Sklar, Joseph Buxbaum (Icahn School of Medicine at Mount Sinai), Bernie Devlin, David Lewis (University of Pittsburgh), Raquel Gur, Chang-Gyu Hahn (University of Pennsylvania), Keisuke Hirai, Hiroyoshi Toyoshiba (Takeda Pharmaceuticals Company Limited), Enrico Domenici, Laurent Essioux (F. Hoffman-La Roche Ltd), Lara Mangravite, Mette Peters (Sage Bionetworks), Thomas Lehner, Barbara Lipska (NIMH).

**GTEEx (dbGaP accession: phs000424.v6.p1):** The Genotype-Tissue Expression (GTEEx) Project was supported by the Common Fund of the Office of the Director of the National Institutes of Health ([commonfund.nih.gov/GTEEx](http://commonfund.nih.gov/GTEEx)). Additional funds were provided by the NCI, NHGRI, NHLBI, NIDA, NIMH, and NINDS. Donors were enrolled at Biospecimen Source Sites funded by NCI Leidos Biomedical Research, Inc. subcontracts to the National Disease Research Interchange (10XS170), Roswell Park Cancer Institute (10XS171), and Science Care, Inc. (X10S172). The Laboratory, Data Analysis, and Coordinating Center (LDACC) was funded through a contract (HHSN268201000029C) to the The Broad Institute, Inc. Biorepository operations were funded through a Leidos Biomedical Research, Inc. subcontract to Van Andel Research Institute (10ST1035). Additional data repository and project management were provided by Leidos Biomedical Research, Inc. (HHSN261200800001E). The Brain Bank was supported supplements to University of Miami grant DA006227. Statistical Methods development grants were made to the University of Geneva (MH090941 & MH101814), the University of Chicago (MH090951, MH090937, MH101825, & MH101820), the University of North Carolina - Chapel Hill (MH090936), North Carolina State University (MH101819), Harvard University (MH090948), Stanford University (MH101782), Washington University (MH101810), and to the University of Pennsylvania (MH101822)

**UK10K (EGA accessions: EGAS00001000108 and EGAS00001000090):** The UK10K project was funded by the Wellcome Trust award WT091310. Twins UK (TUK): TUK was funded by the Wellcome Trust and ENGAGE project grant agreement HEALTH-F4- 2007–201413. The study also receives support from the Department of Health via the National Institute for Health Research (NIHR)-funded BioResource, Clinical Research Facility and Biomedical Research Centre based at Guy's and St. Thomas' NHS Foundation Trust in partnership with King's College London. Dr Spector is an NIHR senior Investigator and ERC Senior Researcher. Funding for the project was also provided by the British Heart Foundation grant PG/12/38/29615 (Dr Jamshidi). A full list of the investigators who contributed to the UK10K sequencing is available from <http://www.UK10K.org>.

**UKB:** This study has been conducted using UK Biobank resource under Application Number 12514. UK Biobank was established by the Wellcome Trust medical charity, Medical Research Council, Department of Health, Scottish Government and the Northwest Regional Development Agency. It has also had funding from the Welsh Assembly Government, British Heart Foundation and Diabetes UK.

### **Supplementary References**

1. UK10K Consortium. The UK10K project identifies rare variants in health and disease. *Nature* **526**, 82-90 (2015).
2. Lin, Y. *et al.* Housekeeping genes, revisited at the single-cell level. *bioRxiv*, 229815 (2017).
3. Eisenberg, E. & Levanon, E.Y. Human housekeeping genes, revisited. *Trends in Genetics* **29**, 569-574 (2013).
4. Yang, J. *et al.* Conditional and joint multiple-SNP analysis of GWAS summary statistics identifies additional variants influencing complex traits. *Nature genetics* **44**, 369-375 (2012).
5. Yang, J., Lee, S.H., Goddard, M.E. & Visscher, P.M. GCTA: a tool for genome-wide complex trait analysis. *The American Journal of Human Genetics* **88**, 76-82 (2011).
6. Fromer, M. *et al.* Gene expression elucidates functional impact of polygenic risk for schizophrenia. *Nature neuroscience* **19**, 1442-1453 (2016).
7. Storey, J.D. & Tibshirani, R. Statistical significance for genomewide studies. *Proceedings of the National Academy of Sciences* **100**, 9440-9445 (2003).
8. International HapMap 3 Consortium. Integrating common and rare genetic variation in diverse human populations. *Nature* **467**, 52-58 (2010).
9. Yang, J. *et al.* Genomic inflation factors under polygenic inheritance. *European Journal of Human Genetics* **19**, 807-812 (2011).
